# Supplementary material for: Pan-Cancer Prediction of Cell-Line Drug Sensitivity Using Network-Based Methods
Source: MDPI journal article supplement (doi:10.3390/ijms23031074), 2022-01-19
Supplement: s1 [file s1]

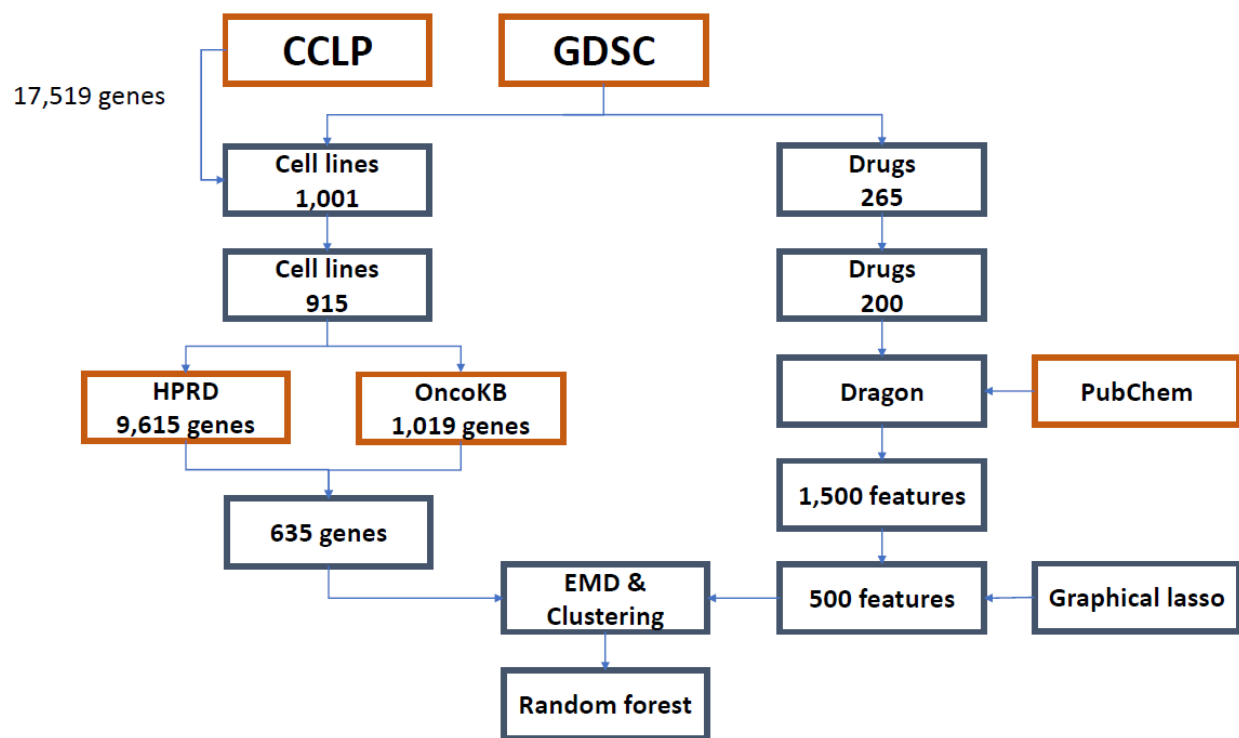

(A)

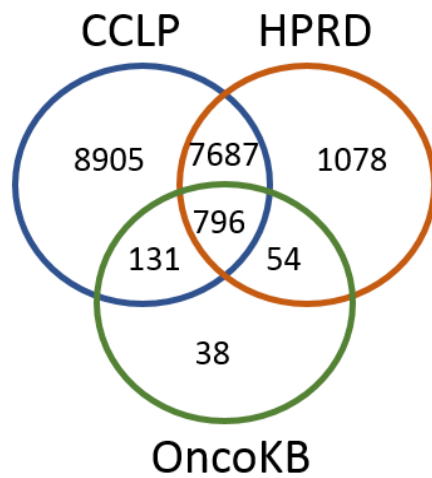

(B)

**Figure S2.** (A) Overview of data analysis; (B) The number of common genes among the gene sets in CCLP, HPRD, and OncoKB databases.
