# Supplementary material for: Pan-Cancer Prediction of Cell-Line Drug Sensitivity Using Network-Based Methods
Source: Int J Mol Sci. 2022 Jan 19;23(3):1074. doi: 10.3390/ijms23031074 (PMC8835038; doi:10.3390/ijms23031074)
Supplement: Supplementary file 1 [file ijms-23-01074-s001.zip › Supplementary Table S1.xlsx]

## Sheet: 915 cell lines
Sample Name	COSMIC identifier	Whole Exome Sequencing (WES)	Copy Number Alterations (CNA)	Gene Expression	Methylation	Drug Response	GDSC Tissue descriptor 1	GDSC Tissue descriptor 2	Clustering
A253	906794	Y	Y	Y	Y	Y	aero_dig_tract	head and neck	6
BB30-HNC	753531	Y	Y	Y	Y	Y	aero_dig_tract	head and neck	6
BB49-HNC	753532	Y	Y	Y	Y	Y	aero_dig_tract	head and neck	4
BHY	753535	Y	Y	Y	Y	Y	aero_dig_tract	head and neck	6
BICR10	1290724	Y	Y	Y	Y	Y	aero_dig_tract	head and neck	3
BICR22	1240121	Y	Y	Y	Y	Y	aero_dig_tract	head and neck	6
BICR31	1290725	Y	Y	Y	Y	Y	aero_dig_tract	head and neck	6
BICR78	1240122	Y	Y	Y	Y	Y	aero_dig_tract	head and neck	5
Ca9-22	753538	Y	Y	Y	Y	Y	aero_dig_tract	head and neck	6
CAL-27	910916	Y	Y	Y	Y	Y	aero_dig_tract	head and neck	6
CAL-33	753541	Y	Y	Y	Y	Y	aero_dig_tract	head and neck	6
Detroit562	906837	Y	Y	Y	Y	Y	aero_dig_tract	head and neck	5
DOK	910936	Y	Y	Y	Y	Y	aero_dig_tract	head and neck	6
FADU	906863	Y	Y	Y	Y	Y	aero_dig_tract	head and neck	5
H3118	1240140	Y	Y	Y	Y	Y	aero_dig_tract	head and neck	6
HN	907059	Y	Y	Y	Y	Y	aero_dig_tract	head and neck	6
HO-1-N-1	924111	Y	Y	Y	Y	Y	aero_dig_tract	head and neck	6
HO-1-u-1	753561	Y	Y	Y	Y	Y	aero_dig_tract	head and neck	5
HSC-2	753562	Y	Y	Y	Y	Y	aero_dig_tract	head and neck	5
HSC-3	907061	Y	Y	Y	Y	Y	aero_dig_tract	head and neck	6
HSC-4	907062	Y	Y	Y	Y	Y	aero_dig_tract	head and neck	5
JHU-011	1240161	Y	Y	Y	Y	Y	aero_dig_tract	head and neck	6
JHU-022	1240162	Y	Y	Y	Y	Y	aero_dig_tract	head and neck	5
KON	1298215	Y	Y	Y	Y	Y	aero_dig_tract	head and neck	6
KOSC-2	753570	Y	Y	Y	Y	Y	aero_dig_tract	head and neck	6
LB771-HNC	753583	Y	Y	Y	Y	Y	aero_dig_tract	head and neck	4
OSC-19	1298362	Y	Y	Y	Y	Y	aero_dig_tract	head and neck	6
OSC-20	1240196	Y	Y	Y	Y	Y	aero_dig_tract	head and neck	5
PCI-15A	1240204	Y	Y	Y	Y	Y	aero_dig_tract	head and neck	6
PCI-30	1298529	Y	Y	Y	Y	Y	aero_dig_tract	head and neck	4
PCI-38	1240205	Y	Y	Y	Y	Y	aero_dig_tract	head and neck	6
PCI-4B	1298531	Y	Y	Y	Y	Y	aero_dig_tract	head and neck	6
PCI-6A	1240206	Y	Y	Y	Y	Y	aero_dig_tract	head and neck	6
PE/CA-PJ15	1240207	Y	Y	Y	Y	Y	aero_dig_tract	head and neck	5
RPMI-2650	909700	Y	Y	Y	Y	Y	aero_dig_tract	head and neck	5
SAS	909708	Y	Y	Y	Y	Y	aero_dig_tract	head and neck	5
SAT	1299050	Y	Y	Y	Y	Y	aero_dig_tract	head and neck	5
SCC-15	910911	Y	Y	Y	Y	Y	aero_dig_tract	head and neck	6
SCC-25	910701	Y	Y	Y	Y	Y	aero_dig_tract	head and neck	6
SCC-4	910904	Y	Y	Y	Y	Y	aero_dig_tract	head and neck	6
SCC-9	909709	Y	Y	Y	Y	Y	aero_dig_tract	head and neck	6
SKN-3	1299059	Y	Y	Y	Y	Y	aero_dig_tract	head and neck	6
COLO-680N	906817	Y	Y	Y	Y	Y	aero_dig_tract	oesophagus	5
EC-GI-10	753555	Y	Y	Y	Y	Y	aero_dig_tract	oesophagus	6
ESO26	1503366	Y	Y	Y	Y	Y	aero_dig_tract	oesophagus	6
ESO51	1503367	Y	Y	Y	Y	Y	aero_dig_tract	oesophagus	6
FLO-1	1503361	Y	Y	Y	Y	Y	aero_dig_tract	oesophagus	4
HCE-4	753559	Y	Y	Y	Y	Y	aero_dig_tract	oesophagus	3
KYAE-1	1503368	Y	Y	Y	Y	Y	aero_dig_tract	oesophagus	6
KYSE-140	753573	Y	Y	Y	Y	Y	aero_dig_tract	oesophagus	6
KYSE-150	907317	Y	Y	Y	Y	Y	aero_dig_tract	oesophagus	6
KYSE-180	907318	Y	Y	Y	Y	Y	aero_dig_tract	oesophagus	6
KYSE-220	1240167	Y	Y	Y	Y	Y	aero_dig_tract	oesophagus	5
KYSE-270	907319	Y	Y	Y	Y	Y	aero_dig_tract	oesophagus	6
KYSE-410	753574	Y	Y	Y	Y	Y	aero_dig_tract	oesophagus	4
KYSE-450	907320	Y	Y	Y	Y	Y	aero_dig_tract	oesophagus	5
KYSE-50	1298222	Y	Y	Y	Y	Y	aero_dig_tract	oesophagus	5
KYSE-510	907321	Y	Y	Y	Y	Y	aero_dig_tract	oesophagus	5
KYSE-520	753575	Y	Y	Y	Y	Y	aero_dig_tract	oesophagus	5
KYSE-70	753576	Y	Y	Y	Y	Y	aero_dig_tract	oesophagus	2
OACM5-1	1503363	Y	Y	Y	Y	Y	aero_dig_tract	oesophagus	5
OACp4C	1503362	Y	Y	Y	Y	Y	aero_dig_tract	oesophagus	5
OE19	910079	Y	Y	Y	Y	Y	aero_dig_tract	oesophagus	6
OE21	1298359	Y	Y	Y	Y	Y	aero_dig_tract	oesophagus	6
OE33	910549	Y	Y	Y	Y	Y	aero_dig_tract	oesophagus	5
SK-GT-4	1503365	Y	Y	Y	Y	Y	aero_dig_tract	oesophagus	5
TE-1	753621	Y	Y	Y	Y	Y	aero_dig_tract	oesophagus	5
TE-10	753622	Y	Y	Y	Y	Y	aero_dig_tract	oesophagus	5
TE-11	946354	Y	Y	Y	Y	Y	aero_dig_tract	oesophagus	5
TE-12	946356	Y	Y	Y	Y	Y	aero_dig_tract	oesophagus	5
TE-15	753614	Y	Y	Y	Y	Y	aero_dig_tract	oesophagus	6
TE-4	1503371	Y	Y	Y	Y	Y	aero_dig_tract	oesophagus	5
TE-5	735784	Y	Y	Y	Y	Y	aero_dig_tract	oesophagus	5
TE-6	946355	Y	Y	Y	Y	Y	aero_dig_tract	oesophagus	5
TE-8	753623	Y	Y	Y	Y	Y	aero_dig_tract	oesophagus	5
TE-9	946353	Y	Y	Y	Y	Y	aero_dig_tract	oesophagus	5
T-T	1299064	Y	Y	Y	Y	Y	aero_dig_tract	oesophagus	5
CESS	910688	Y	Y	Y	Y	Y	leukemia	acute_myeloid_leukaemia	1
CTV-1	753548	Y	Y	Y	Y	Y	leukemia	acute_myeloid_leukaemia	1
GDM-1	906870	Y	Y	Y	Y	Y	leukemia	acute_myeloid_leukaemia	1
HEL	907053	Y	Y	Y	Y	Y	leukemia	acute_myeloid_leukaemia	1
HL-60	905938	Y	Y	Y	Y	Y	leukemia	acute_myeloid_leukaemia	1
KASUMI-1	907275	Y	Y	Y	Y	Y	leukemia	acute_myeloid_leukaemia	1
KG-1	907278	Y	Y	Y	Y	Y	leukemia	acute_myeloid_leukaemia	1
KMOE-2	907280	Y	Y	Y	Y	Y	leukemia	acute_myeloid_leukaemia	1
ME-1	1330942	Y	Y	Y	Y	Y	leukemia	acute_myeloid_leukaemia	1
ML-2	908141	Y	Y	Y	Y	Y	leukemia	acute_myeloid_leukaemia	1
MOLM-13	1330947	Y	Y	Y	Y	Y	leukemia	acute_myeloid_leukaemia	1
MONO-MAC-6	908148	Y	Y	Y	Y	Y	leukemia	acute_myeloid_leukaemia	1
NKM-1	908448	Y	Y	Y	Y	Y	leukemia	acute_myeloid_leukaemia	1
NOMO-1	908451	Y	Y	Y	Y	Y	leukemia	acute_myeloid_leukaemia	1
OCI-AML2	910947	Y	Y	Y	Y	Y	leukemia	acute_myeloid_leukaemia	1
OCI-AML3	1290455	Y	Y	Y	Y	Y	leukemia	acute_myeloid_leukaemia	1
OCI-AML5	1330983	Y	Y	Y	Y	Y	leukemia	acute_myeloid_leukaemia	1
OCI-M1	1330985	Y	Y	Y	Y	Y	leukemia	acute_myeloid_leukaemia	1
P31-FUJ	909253	Y	Y	Y	Y	Y	leukemia	acute_myeloid_leukaemia	1
PL-21	1330991	Y	Y	Y	Y	Y	leukemia	acute_myeloid_leukaemia	1
QIMR-WIL	910545	Y	Y	Y	Y	Y	leukemia	acute_myeloid_leukaemia	1
SIG-M5	909715	Y	Y	Y	Y	Y	leukemia	acute_myeloid_leukaemia	1
THP-1	909771	Y	Y	Y	Y	Y	leukemia	acute_myeloid_leukaemia	1
BALL-1	910705	Y	Y	Y	Y	Y	leukemia	B_cell_leukemia	1
KARPAS-231	1327774	Y	Y	Y	Y	Y	leukemia	B_cell_leukemia	1
KOPN-8	1330933	Y	Y	Y	Y	Y	leukemia	B_cell_leukemia	1
MHH-CALL-2	908132	Y	Y	Y	Y	Y	leukemia	B_cell_leukemia	1
MHH-PREB-1	908136	Y	Y	Y	Y	Y	leukemia	B_cell_leukemia	1
MN-60	908143	Y	Y	Y	Y	Y	leukemia	B_cell_leukemia	1
NALM-6	908158	Y	Y	Y	Y	Y	leukemia	B_cell_leukemia	1
RCH-ACV	1330994	Y	Y	Y	Y	Y	leukemia	B_cell_leukemia	1
REH	909696	Y	Y	Y	Y	Y	leukemia	B_cell_leukemia	1
ROS-50	1331025	Y	Y	Y	Y	Y	leukemia	B_cell_leukemia	1
SUP-B8	910209	Y	Y	Y	Y	Y	leukemia	B_cell_leukemia	1
U-698-M	909777	Y	Y	Y	Y	Y	leukemia	B_cell_leukemia	1
A3-KAW	910935	Y	Y	Y	Y	Y	lymphoma	B_cell_lymphoma	1
A4-Fuk	910934	Y	Y	Y	Y	Y	lymphoma	B_cell_lymphoma	1
BC-1	910919	Y	Y	Y	Y	Y	lymphoma	B_cell_lymphoma	1
CRO-AP2	906807	Y	Y	Y	Y	Y	lymphoma	B_cell_lymphoma	1
CTB-1	949088	Y	Y	Y	Y	Y	lymphoma	B_cell_lymphoma	1
DB	906832	Y	Y	Y	Y	Y	lymphoma	B_cell_lymphoma	1
DOHH-2	906842	Y	Y	Y	Y	Y	lymphoma	B_cell_lymphoma	1
Farage	1297449	Y	Y	Y	Y	Y	lymphoma	B_cell_lymphoma	1
GRANTA-519	1303897	Y	Y	Y	Y	Y	lymphoma	B_cell_lymphoma	1
JEKO-1	1327765	Y	Y	Y	Y	Y	lymphoma	B_cell_lymphoma	1
JSC-1	1327769	Y	Y	Y	Y	Y	lymphoma	B_cell_lymphoma	1
KARPAS-1106P	1327773	Y	Y	Y	Y	Y	lymphoma	B_cell_lymphoma	1
KARPAS-422	907274	Y	Y	Y	Y	Y	lymphoma	B_cell_lymphoma	1
MC116	907799	Y	Y	Y	Y	Y	lymphoma	B_cell_lymphoma	1
NU-DUL-1	1330982	Y	Y	Y	Y	Y	lymphoma	B_cell_lymphoma	1
OCI-LY-19	1330984	Y	Y	Y	Y	Y	lymphoma	B_cell_lymphoma	1
RC-K8	1330995	Y	Y	Y	Y	Y	lymphoma	B_cell_lymphoma	1
RL	910861	Y	Y	Y	Y	Y	lymphoma	B_cell_lymphoma	1
SCC-3	910930	Y	Y	Y	Y	Y	lymphoma	B_cell_lymphoma	1
SLVL	1331032	Y	Y	Y	Y	Y	lymphoma	B_cell_lymphoma	1
SU-DHL-10	1331033	Y	Y	Y	Y	Y	lymphoma	B_cell_lymphoma	1
SU-DHL-16	1331034	Y	Y	Y	Y	Y	lymphoma	B_cell_lymphoma	1
SU-DHL-4	1331035	Y	Y	Y	Y	Y	lymphoma	B_cell_lymphoma	1
SU-DHL-5	1331036	Y	Y	Y	Y	Y	lymphoma	B_cell_lymphoma	1
SU-DHL-6	1331037	Y	Y	Y	Y	Y	lymphoma	B_cell_lymphoma	1
SU-DHL-8	1331038	Y	Y	Y	Y	Y	lymphoma	B_cell_lymphoma	1
TK	1331045	Y	Y	Y	Y	Y	lymphoma	B_cell_lymphoma	1
TUR	909773	Y	Y	Y	Y	Y	lymphoma	B_cell_lymphoma	1
VAL	1331048	Y	Y	Y	Y	Y	lymphoma	B_cell_lymphoma	1
WSU-DLCL2	1331050	Y	Y	Y	Y	Y	lymphoma	B_cell_lymphoma	1
BL-41	910706	Y	Y	Y	Y	Y	lymphoma	Burkitt_lymphoma	1
CA46	910703	Y	Y	Y	Y	Y	lymphoma	Burkitt_lymphoma	1
Daudi	906831	Y	Y	Y	Y	Y	lymphoma	Burkitt_lymphoma	1
DG-75	906838	Y	Y	Y	Y	Y	lymphoma	Burkitt_lymphoma	1
EB2	906846	Y	Y	Y	Y	Y	lymphoma	Burkitt_lymphoma	1
EB-3	906847	Y	Y	Y	Y	Y	lymphoma	Burkitt_lymphoma	1
GA-10	1303896	Y	Y	Y	Y	Y	lymphoma	Burkitt_lymphoma	1
JiyoyeP-2003	907268	Y	Y	Y	Y	Y	lymphoma	Burkitt_lymphoma	1
NAMALWA	908159	Y	Y	Y	Y	Y	lymphoma	Burkitt_lymphoma	1
P32-ISH	1330987	Y	Y	Y	Y	Y	lymphoma	Burkitt_lymphoma	1
Raji	909262	Y	Y	Y	Y	Y	lymphoma	Burkitt_lymphoma	1
Ramos-2G6-4C10	910401	Y	Y	Y	Y	Y	lymphoma	Burkitt_lymphoma	1
ST486	910906	Y	Y	Y	Y	Y	lymphoma	Burkitt_lymphoma	1
BV-173	910710	Y	Y	Y	Y	Y	leukemia	chronic_myeloid_leukaemia	1
CML-T1	910951	Y	Y	Y	Y	Y	leukemia	chronic_myeloid_leukaemia	1
EM-2	906855	Y	Y	Y	Y	Y	leukemia	chronic_myeloid_leukaemia	1
JURL-MK1	1327771	Y	Y	Y	Y	Y	leukemia	chronic_myeloid_leukaemia	1
K-562	905940	Y	Y	Y	Y	Y	leukemia	chronic_myeloid_leukaemia	1
KCL-22	1330931	Y	Y	Y	Y	Y	leukemia	chronic_myeloid_leukaemia	1
KU812	907311	Y	Y	Y	Y	Y	leukemia	chronic_myeloid_leukaemia	1
LAMA-84	907783	Y	Y	Y	Y	Y	leukemia	chronic_myeloid_leukaemia	1
MEG-01	908126	Y	Y	Y	Y	Y	leukemia	chronic_myeloid_leukaemia	1
RPMI-8866	910544	Y	Y	Y	Y	Y	leukemia	chronic_myeloid_leukaemia	1
AMO-1	1295741	Y	Y	Y	Y	Y	myeloma	haematopoietic_neoplasm other	1
EoL-1-cell	906856	Y	Y	Y	Y	Y	leukemia	haematopoietic_neoplasm other	1
JJN-3	1327766	Y	Y	Y	Y	Y	myeloma	haematopoietic_neoplasm other	1
KARPAS-620	1327775	Y	Y	Y	Y	Y	myeloma	haematopoietic_neoplasm other	1
MC-CAR	683665	Y	Y	Y	Y	Y	myeloma	haematopoietic_neoplasm other	1
SKM-1	909722	Y	Y	Y	Y	Y	leukemia	haematopoietic_neoplasm other	1
HDLM-2	924110	Y	Y	Y	Y	Y	lymphoma	Hodgkin_lymphoma	1
HD-MY-Z	907050	Y	Y	Y	Y	Y	lymphoma	Hodgkin_lymphoma	4
Hs-445	1322218	Y	Y	Y	Y	Y	lymphoma	Hodgkin_lymphoma	1
KM-H2	909976	Y	Y	Y	Y	Y	lymphoma	Hodgkin_lymphoma	1
L-1236	1330935	Y	Y	Y	Y	Y	lymphoma	Hodgkin_lymphoma	1
L-428	907322	Y	Y	Y	Y	Y	lymphoma	Hodgkin_lymphoma	1
L-540	907323	Y	Y	Y	Y	Y	lymphoma	Hodgkin_lymphoma	1
RPMI-6666	909701	Y	Y	Y	Y	Y	lymphoma	Hodgkin_lymphoma	1
SUP-HD1	1331039	Y	Y	Y	Y	Y	lymphoma	Hodgkin_lymphoma	1
697	906800	Y	Y	Y	Y	Y	leukemia	lymphoblastic_leukemia	1
ALL-PO	910944	Y	Y	Y	Y	Y	leukemia	lymphoblastic_leukemia	1
BE-13	906763	Y	Y	Y	Y	Y	leukemia	lymphoblastic_leukemia	1
CCRF-CEM	905952	Y	Y	Y	Y	Y	leukemia	lymphoblastic_leukemia	1
GR-ST	906877	Y	Y	Y	Y	Y	leukemia	lymphoblastic_leukemia	1
HAL-01	949153	Y	Y	Y	Y	Y	leukemia	lymphoblastic_leukemia	1
KARPAS-45	907272	Y	Y	Y	Y	Y	leukemia	lymphoblastic_leukemia	1
KE-37	907277	Y	Y	Y	Y	Y	leukemia	lymphoblastic_leukemia	1
LC4-1	907787	Y	Y	Y	Y	Y	leukemia	lymphoblastic_leukemia	1
MOLT-4	905958	Y	Y	Y	Y	Y	leukemia	lymphoblastic_leukemia	1
P30-OHK	909252	Y	Y	Y	Y	Y	leukemia	lymphoblastic_leukemia	1
SUP-B15	1247871	Y	Y	Y	Y	Y	leukemia	lymphoblastic_leukemia	1
ATN-1	910687	Y	Y	Y	Y	Y	leukemia	lymphoblastic_T_cell_leukaemia	1
LOUCY	907789	Y	Y	Y	Y	Y	leukemia	lymphoblastic_T_cell_leukaemia	1
MOLT-13	908146	Y	Y	Y	Y	Y	leukemia	lymphoblastic_T_cell_leukaemia	1
MOLT-16	908147	Y	Y	Y	Y	Y	leukemia	lymphoblastic_T_cell_leukaemia	1
P12-ICHIKAWA	909251	Y	Y	Y	Y	Y	leukemia	lymphoblastic_T_cell_leukaemia	1
PF-382	909260	Y	Y	Y	Y	Y	leukemia	lymphoblastic_T_cell_leukaemia	1
RPMI-8402	909702	Y	Y	Y	Y	Y	leukemia	lymphoblastic_T_cell_leukaemia	1
SUP-T1	909743	Y	Y	Y	Y	Y	leukemia	lymphoblastic_T_cell_leukaemia	1
DEL	906836	Y	Y	Y	Y	Y	lymphoma	lymphoid_neoplasm other	5
EHEB	906854	Y	Y	Y	Y	Y	lymphoma	lymphoid_neoplasm other	1
EJM	1297447	Y	Y	Y	Y	Y	myeloma	lymphoid_neoplasm other	1
H9	907043	Y	Y	Y	Y	Y	lymphoma	lymphoid_neoplasm other	1
JVM-2	907269	Y	Y	Y	Y	Y	lymphoma	lymphoid_neoplasm other	1
JVM-3	907270	Y	Y	Y	Y	Y	lymphoma	lymphoid_neoplasm other	1
SR	905965	Y	Y	Y	Y	Y	lymphoma	lymphoid_neoplasm other	1
WIL2-NS	1331049	Y	Y	Y	Y	Y	lymphoma	lymphoid_neoplasm other	1
WSU-NHL	909785	Y	Y	Y	Y	Y	lymphoma	lymphoid_neoplasm other	1
YT	946358	Y	Y	Y	Y	Y	lymphoma	lymphoid_neoplasm other	1
ARH-77	906765	Y	Y	Y	Y	Y	myeloma	myeloma	1
IM-9	753563	Y	Y	Y	Y	Y	myeloma	myeloma	1
KMS-12-BM	907281	Y	Y	Y	Y	Y	myeloma	myeloma	1
L-363	924239	Y	Y	Y	Y	Y	myeloma	myeloma	1
LP-1	907791	Y	Y	Y	Y	Y	myeloma	myeloma	1
MM1S	1659818	Y	Y	Y	Y	Y	myeloma	myeloma	1
MOLP-8	1330950	Y	Y	Y	Y	Y	myeloma	myeloma	5
NCI-H929	724825	Y	Y	Y	Y	Y	myeloma	myeloma	1
OPM-2	909249	Y	Y	Y	Y	Y	myeloma	myeloma	1
RPMI-8226	905964	Y	Y	Y	Y	Y	myeloma	myeloma	1
SK-MM-2	753612	Y	Y	Y	Y	Y	myeloma	myeloma	1
U-266	753615	Y	Y	Y	Y	Y	myeloma	myeloma	1
CAL-78	1290765	Y	Y	Y	Y	Y	bone	chondrosarcoma	3
CHSA8926	1303912	Y	Y	Y	Y	Y	bone	chondrosarcoma	3
H-EMC-SS	907290	Y	Y	Y	Y	Y	bone	chondrosarcoma	2
CADO-ES1	753539	Y	Y	Y	Y	Y	bone	ewings_sarcoma	2
ES1	949158	Y	Y	Y	Y	Y	bone	ewings_sarcoma	2
ES3	684055	Y	Y	Y	Y	Y	bone	ewings_sarcoma	2
ES4	949156	Y	Y	Y	Y	Y	bone	ewings_sarcoma	2
ES5	684057	Y	Y	Y	Y	Y	bone	ewings_sarcoma	2
ES7	684059	Y	Y	Y	Y	Y	bone	ewings_sarcoma	2
ES8	949155	Y	Y	Y	Y	Y	bone	ewings_sarcoma	2
EW-1	949163	Y	Y	Y	Y	Y	bone	ewings_sarcoma	2
EW-11	684062	Y	Y	Y	Y	Y	bone	ewings_sarcoma	2
EW-13	949166	Y	Y	Y	Y	Y	bone	ewings_sarcoma	2
EW-16	949165	Y	Y	Y	Y	Y	bone	ewings_sarcoma	2
EW-18	949164	Y	Y	Y	Y	Y	bone	ewings_sarcoma	2
EW-22	949167	Y	Y	Y	Y	Y	bone	ewings_sarcoma	2
EW-24	949168	Y	Y	Y	Y	Y	bone	ewings_sarcoma	2
EW-3	949161	Y	Y	Y	Y	Y	bone	ewings_sarcoma	2
EW-7	949160	Y	Y	Y	Y	Y	bone	ewings_sarcoma	2
SK-ES-1	684072	Y	Y	Y	Y	Y	bone	ewings_sarcoma	2
SK-PN-DW	909731	Y	Y	Y	Y	Y	bone	ewings_sarcoma	2
TC-71	1240221	Y	Y	Y	Y	Y	bone	ewings_sarcoma	2
CAL-72	906827	Y	Y	Y	Y	Y	bone	osteosarcoma	3
G-292 Clone A141B1	1290807	Y	Y	Y	Y	Y	bone	osteosarcoma	3
HOS	907060	Y	Y	Y	Y	Y	bone	osteosarcoma	3
HuO-3N1	909977	Y	Y	Y	Y	Y	bone	osteosarcoma	3
HuO9	907072	Y	Y	Y	Y	Y	bone	osteosarcoma	3
MG-63	908131	Y	Y	Y	Y	Y	bone	osteosarcoma	3
NOS-1	925345	Y	Y	Y	Y	Y	bone	osteosarcoma	2
NY	910849	Y	Y	Y	Y	Y	bone	osteosarcoma	3
Saos-2	909707	Y	Y	Y	Y	Y	bone	osteosarcoma	3
U-2-OS	909776	Y	Y	Y	Y	Y	bone	osteosarcoma	3
AU565	910704	Y	Y	Y	Y	Y	breast	breast	6
BT-20	906801	Y	Y	Y	Y	Y	breast	breast	6
BT-474	946359	Y	Y	Y	Y	Y	breast	breast	5
BT-483	949093	Y	Y	Y	Y	Y	breast	breast	5
BT-549	905951	Y	Y	Y	Y	Y	breast	breast	4
CAL-120	906826	Y	Y	Y	Y	Y	breast	breast	4
CAL-148	924106	Y	Y	Y	Y	Y	breast	breast	5
CAL-51	910927	Y	Y	Y	Y	Y	breast	breast	6
CAL-85-1	910852	Y	Y	Y	Y	Y	breast	breast	6
CAMA-1	946382	Y	Y	Y	Y	Y	breast	breast	5
COLO-824	906812	Y	Y	Y	Y	Y	breast	breast	5
DU-4475	906844	Y	Y	Y	Y	Y	breast	breast	6
EFM-19	906851	Y	Y	Y	Y	Y	breast	breast	5
EFM-192A	1290798	Y	Y	Y	Y	Y	breast	breast	6
EVSA-T	906862	Y	Y	Y	Y	Y	breast	breast	6
HCC1143	749710	Y	Y	Y	Y	Y	breast	breast	6
HCC1187	749711	Y	Y	Y	Y	Y	breast	breast	5
HCC1395	749712	Y	Y	Y	Y	Y	breast	breast	3
HCC1419	907045	Y	Y	Y	Y	Y	breast	breast	6
HCC1428	1290905	Y	Y	Y	Y	Y	breast	breast	5
HCC1500	1303900	Y	Y	Y	Y	Y	breast	breast	6
HCC1569	907046	Y	Y	Y	Y	Y	breast	breast	5
HCC1599	749713	Y	Y	Y	Y	Y	breast	breast	5
HCC1806	907047	Y	Y	Y	Y	Y	breast	breast	6
HCC1937	749714	Y	Y	Y	Y	Y	breast	breast	5
HCC1954	749709	Y	Y	Y	Y	Y	breast	breast	6
HCC202	1290906	Y	Y	Y	Y	Y	breast	breast	6
HCC2157	749715	Y	Y	Y	Y	Y	breast	breast	6
HCC2218	749716	Y	Y	Y	Y	Y	breast	breast	6
HCC38	749717	Y	Y	Y	Y	Y	breast	breast	5
HCC70	907048	Y	Y	Y	Y	Y	breast	breast	5
HDQ-P1	1290922	Y	Y	Y	Y	Y	breast	breast	6
Hs-578-T	905957	Y	Y	Y	Y	Y	breast	breast	3
MCF7	905946	Y	Y	Y	Y	Y	breast	breast	5
MDA-MB-157	925338	Y	Y	Y	Y	Y	breast	breast	5
MDA-MB-231	905960	Y	Y	Y	Y	Y	breast	breast	4
MDA-MB-330	1330941	Y	Y	Y	Y	Y	breast	breast	6
MDA-MB-361	908121	Y	Y	Y	Y	Y	breast	breast	5
MDA-MB-415	924240	Y	Y	Y	Y	Y	breast	breast	6
MDA-MB-436	1240172	Y	Y	Y	Y	Y	breast	breast	4
MDA-MB-453	908122	Y	Y	Y	Y	Y	breast	breast	5
MDA-MB-468	908123	Y	Y	Y	Y	Y	breast	breast	5
MFM-223	910948	Y	Y	Y	Y	Y	breast	breast	5
MRK-nu-1	908151	Y	Y	Y	Y	Y	breast	breast	5
OCUB-M	909256	Y	Y	Y	Y	Y	breast	breast	5
T47D	905945	Y	Y	Y	Y	Y	breast	breast	5
UACC-812	910910	Y	Y	Y	Y	Y	breast	breast	6
UACC-893	909778	Y	Y	Y	Y	Y	breast	breast	6
ZR-75-30	909907	Y	Y	Y	Y	Y	breast	breast	5
EGI-1	906853	Y	Y	Y	Y	Y	digestive_system	biliary_tract	5
ETK-1	906861	Y	Y	Y	Y	Y	digestive_system	biliary_tract	5
HuCCT1	907069	Y	Y	Y	Y	Y	digestive_system	biliary_tract	5
TGBC1TKB	909769	Y	Y	Y	Y	Y	digestive_system	biliary_tract	5
TGBC24TKB	910695	Y	Y	Y	Y	Y	digestive_system	biliary_tract	5
C2BBe1	910700	Y	Y	Y	Y	Y	large_intestine	large_intestine	6
CaR-1	924108	Y	Y	Y	Y	Y	large_intestine	large_intestine	5
CCK-81	1240123	Y	Y	Y	Y	Y	large_intestine	large_intestine	6
CL-11	1290769	Y	Y	Y	Y	Y	large_intestine	large_intestine	5
CL-40	1240124	Y	Y	Y	Y	Y	large_intestine	large_intestine	6
COLO-205	905961	Y	Y	Y	Y	Y	large_intestine	large_intestine	6
COLO-320-HSR	910569	Y	Y	Y	Y	Y	large_intestine	large_intestine	2
COLO-678	910689	Y	Y	Y	Y	Y	large_intestine	large_intestine	5
CW-2	910554	Y	Y	Y	Y	Y	large_intestine	large_intestine	6
GP5d	907291	Y	Y	Y	Y	Y	large_intestine	large_intestine	6
HCC2998	905971	Y	Y	Y	Y	Y	large_intestine	large_intestine	6
HCC-56	1290907	Y	Y	Y	Y	Y	large_intestine	large_intestine	6
HCT-116	905936	Y	Y	Y	Y	Y	large_intestine	large_intestine	5
HCT-15	905937	Y	Y	Y	Y	Y	large_intestine	large_intestine	5
HT-115	907289	Y	Y	Y	Y	Y	large_intestine	large_intestine	6
HT-29	905939	Y	Y	Y	Y	Y	large_intestine	large_intestine	5
HT55	907287	Y	Y	Y	Y	Y	large_intestine	large_intestine	6
KM12	905989	Y	Y	Y	Y	Y	large_intestine	large_intestine	6
LoVo	907790	Y	Y	Y	Y	Y	large_intestine	large_intestine	6
LS-1034	917486	Y	Y	Y	Y	Y	large_intestine	large_intestine	6
LS-123	907792	Y	Y	Y	Y	Y	large_intestine	large_intestine	5
LS-180	998189	Y	Y	Y	Y	Y	large_intestine	large_intestine	6
LS-411N	907794	Y	Y	Y	Y	Y	large_intestine	large_intestine	6
LS-513	907795	Y	Y	Y	Y	Y	large_intestine	large_intestine	6
MDST8	1240173	Y	Y	Y	Y	Y	large_intestine	large_intestine	3
NCI-H630	908482	Y	Y	Y	Y	Y	large_intestine	large_intestine	6
NCI-H716	908458	Y	Y	Y	Y	Y	large_intestine	large_intestine	2
NCI-H747	908457	Y	Y	Y	Y	Y	large_intestine	large_intestine	5
RCM-1	909263	Y	Y	Y	Y	Y	large_intestine	large_intestine	6
RKO	909698	Y	Y	Y	Y	Y	large_intestine	large_intestine	5
SK-CO-1	909718	Y	Y	Y	Y	Y	large_intestine	large_intestine	6
SNU-1040	1659823	Y	Y	Y	Y	Y	large_intestine	large_intestine	6
SNU-175	1659928	Y	Y	Y	Y	Y	large_intestine	large_intestine	6
SNU-407	1660034	Y	Y	Y	Y	Y	large_intestine	large_intestine	5
SNU-61	1660035	Y	Y	Y	Y	Y	large_intestine	large_intestine	6
SNU-81	1660036	Y	Y	Y	Y	Y	large_intestine	large_intestine	6
SNU-C1	910905	Y	Y	Y	Y	Y	large_intestine	large_intestine	6
SNU-C2B	909740	Y	Y	Y	Y	Y	large_intestine	large_intestine	5
SNU-C5	1674021	Y	Y	Y	Y	Y	large_intestine	large_intestine	5
SW1116	909746	Y	Y	Y	Y	Y	large_intestine	large_intestine	5
SW1417	909747	Y	Y	Y	Y	Y	large_intestine	large_intestine	6
SW1463	909748	Y	Y	Y	Y	Y	large_intestine	large_intestine	6
SW48	909751	Y	Y	Y	Y	Y	large_intestine	large_intestine	5
SW837	909755	Y	Y	Y	Y	Y	large_intestine	large_intestine	5
SW948	909757	Y	Y	Y	Y	Y	large_intestine	large_intestine	6
T84	909761	Y	Y	Y	Y	Y	large_intestine	large_intestine	6
C3A	910850	Y	Y	Y	Y	Y	digestive_system	liver	6
Hep 3B2_1-7	1240147	Y	Y	Y	Y	Y	digestive_system	liver	5
HLE	907057	Y	Y	Y	Y	Y	digestive_system	liver	4
huH-1	1298146	Y	Y	Y	Y	Y	digestive_system	liver	5
HuH-7	907071	Y	Y	Y	Y	Y	digestive_system	liver	5
JHH-1	1298151	Y	Y	Y	Y	Y	digestive_system	liver	6
JHH-6	1240159	Y	Y	Y	Y	Y	digestive_system	liver	4
JHH-7	1240160	Y	Y	Y	Y	Y	digestive_system	liver	5
SK-HEP-1	909719	Y	Y	Y	Y	Y	digestive_system	liver	4
SNU-182	1240216	Y	Y	Y	Y	Y	digestive_system	liver	3
SNU-387	909736	Y	Y	Y	Y	Y	digestive_system	liver	3
SNU-398	1240217	Y	Y	Y	Y	Y	digestive_system	liver	2
SNU-423	909737	Y	Y	Y	Y	Y	digestive_system	liver	4
SNU-449	909738	Y	Y	Y	Y	Y	digestive_system	liver	4
SNU-475	909739	Y	Y	Y	Y	Y	digestive_system	liver	3
23132-87	910924	Y	Y	Y	Y	Y	digestive_system	stomach	6
AGS	906790	Y	Y	Y	Y	Y	digestive_system	stomach	5
ECC10	906848	Y	Y	Y	Y	Y	digestive_system	stomach	2
FU97	1290806	Y	Y	Y	Y	Y	digestive_system	stomach	5
GCIY	906869	Y	Y	Y	Y	Y	digestive_system	stomach	4
GT3TKB	907041	Y	Y	Y	Y	Y	digestive_system	stomach	4
HGC-27	907055	Y	Y	Y	Y	Y	digestive_system	stomach	2
Hs746T	1240151	Y	Y	Y	Y	Y	digestive_system	stomach	4
HSC-39	1322224	Y	Y	Y	Y	Y	digestive_system	stomach	6
IM-95	1240155	Y	Y	Y	Y	Y	digestive_system	stomach	6
KATOIII	907276	Y	Y	Y	Y	Y	digestive_system	stomach	6
MKN1	908138	Y	Y	Y	Y	Y	digestive_system	stomach	6
MKN28	908139	Y	Y	Y	Y	Y	digestive_system	stomach	5
MKN45	925340	Y	Y	Y	Y	Y	digestive_system	stomach	6
MKN7	924250	Y	Y	Y	Y	Y	digestive_system	stomach	6
NCI-N87	908461	Y	Y	Y	Y	Y	digestive_system	stomach	5
NCI-SNU-1	908444	Y	Y	Y	Y	Y	digestive_system	stomach	5
NCI-SNU-16	908446	Y	Y	Y	Y	Y	digestive_system	stomach	6
NCI-SNU-5	908445	Y	Y	Y	Y	Y	digestive_system	stomach	4
NUGC-3	908455	Y	Y	Y	Y	Y	digestive_system	stomach	5
NUGC-4	1298357	Y	Y	Y	Y	Y	digestive_system	stomach	6
OCUM-1	1298358	Y	Y	Y	Y	Y	digestive_system	stomach	6
RERF-GC-1B	1240209	Y	Y	Y	Y	Y	digestive_system	stomach	5
RF-48	909697	Y	Y	Y	Y	Y	digestive_system	stomach	1
SCH	909711	Y	Y	Y	Y	Y	digestive_system	stomach	5
SK-GT-2	1503364	Y	Y	Y	Y	Y	digestive_system	stomach	6
TGBC11TKB	909770	Y	Y	Y	Y	Y	digestive_system	stomach	6
769-P	910922	Y	Y	Y	Y	Y	kidney	kidney	4
786-0	905947	Y	Y	Y	Y	Y	kidney	kidney	4
A498	905948	Y	Y	Y	Y	Y	kidney	kidney	4
A704	910920	Y	Y	Y	Y	Y	kidney	kidney	6
ACHN	905950	Y	Y	Y	Y	Y	kidney	kidney	4
BB65-RCC	753533	Y	Y	Y	Y	Y	kidney	kidney	4
BFTC-909	910698	Y	Y	Y	Y	Y	kidney	kidney	3
CAKI-1	905963	Y	Y	Y	Y	Y	kidney	kidney	4
CAL-54	910952	Y	Y	Y	Y	Y	kidney	kidney	4
G-401	907299	Y	Y	Y	Y	Y	kidney	kidney	5
HA7-RCC	753558	Y	Y	Y	Y	Y	kidney	kidney	4
KMRC-1	1298168	Y	Y	Y	Y	Y	kidney	kidney	4
KMRC-20	1298169	Y	Y	Y	Y	Y	kidney	kidney	4
LB1047-RCC	753577	Y	Y	Y	Y	Y	kidney	kidney	4
LB2241-RCC	753578	Y	Y	Y	Y	Y	kidney	kidney	4
LB996-RCC	753585	Y	Y	Y	Y	Y	kidney	kidney	4
NCC010	1509073	Y	Y	Y	Y	Y	kidney	kidney	4
NCC021	1509074	Y	Y	Y	Y	Y	kidney	kidney	4
OS-RC-2	909250	Y	Y	Y	Y	Y	kidney	kidney	4
RCC10RGB	909974	Y	Y	Y	Y	Y	kidney	kidney	4
RCC-AB	1524418	Y	Y	Y	Y	Y	kidney	kidney	6
RCC-ER	1524417	Y	Y	Y	Y	Y	kidney	kidney	4
RCC-FG2	1524414	Y	Y	Y	Y	Y	kidney	kidney	4
RCC-JW	1524416	Y	Y	Y	Y	Y	kidney	kidney	4
RCC-MF	1524419	Y	Y	Y	Y	Y	kidney	kidney	6
RXF393	905978	Y	Y	Y	Y	Y	kidney	kidney	3
SN12C	905979	Y	Y	Y	Y	Y	kidney	kidney	4
TK10	905980	Y	Y	Y	Y	Y	kidney	kidney	4
U031	905981	Y	Y	Y	Y	Y	kidney	kidney	4
VMRC-RCZ	909781	Y	Y	Y	Y	Y	kidney	kidney	4
201T	1287381	Y	Y	Y	Y	Y	lung_NSCLC	lung_NSCLC_adenocarcinoma	5
A549	905949	Y	Y	Y	Y	Y	lung_NSCLC	lung_NSCLC_adenocarcinoma	4
ABC-1	906791	Y	Y	Y	Y	Y	lung_NSCLC	lung_NSCLC_adenocarcinoma	5
Calu-3	687777	Y	Y	Y	Y	Y	lung_NSCLC	lung_NSCLC_adenocarcinoma	5
Calu-6	724859	Y	Y	Y	Y	Y	lung_NSCLC	lung_NSCLC_adenocarcinoma	4
COR-L105	906805	Y	Y	Y	Y	Y	lung_NSCLC	lung_NSCLC_adenocarcinoma	4
EKVX	905970	Y	Y	Y	Y	Y	lung_NSCLC	lung_NSCLC_adenocarcinoma	4
EMC-BAC-1	1503369	Y	Y	Y	Y	Y	lung_NSCLC	lung_NSCLC_adenocarcinoma	4
EMC-BAC-2	1503370	Y	Y	Y	Y	Y	lung_NSCLC	lung_NSCLC_adenocarcinoma	4
H3255	1247873	Y	Y	Y	Y	Y	lung_NSCLC	lung_NSCLC_adenocarcinoma	6
HCC-44	1240145	Y	Y	Y	Y	Y	lung_NSCLC	lung_NSCLC_adenocarcinoma	4
HCC-78	1290908	Y	Y	Y	Y	Y	lung_NSCLC	lung_NSCLC_adenocarcinoma	5
HCC-827	1240146	Y	Y	Y	Y	Y	lung_NSCLC	lung_NSCLC_adenocarcinoma	5
LC-2-ad	907786	Y	Y	Y	Y	Y	lung_NSCLC	lung_NSCLC_adenocarcinoma	5
LXF-289	753592	Y	Y	Y	Y	Y	lung_NSCLC	lung_NSCLC_adenocarcinoma	4
NCI-H1355	724866	Y	Y	Y	Y	Y	lung_NSCLC	lung_NSCLC_adenocarcinoma	4
NCI-H1395	684681	Y	Y	Y	Y	Y	lung_NSCLC	lung_NSCLC_adenocarcinoma	3
NCI-H1435	1298347	Y	Y	Y	Y	Y	lung_NSCLC	lung_NSCLC_adenocarcinoma	6
NCI-H1563	753600	Y	Y	Y	Y	Y	lung_NSCLC	lung_NSCLC_adenocarcinoma	4
NCI-H1568	1298348	Y	Y	Y	Y	Y	lung_NSCLC	lung_NSCLC_adenocarcinoma	5
NCI-H1573	908472	Y	Y	Y	Y	Y	lung_NSCLC	lung_NSCLC_adenocarcinoma	5
NCI-H1623	687798	Y	Y	Y	Y	Y	lung_NSCLC	lung_NSCLC_adenocarcinoma	5
NCI-H1648	687799	Y	Y	Y	Y	Y	lung_NSCLC	lung_NSCLC_adenocarcinoma	5
NCI-H1651	910900	Y	Y	Y	Y	Y	lung_NSCLC	lung_NSCLC_adenocarcinoma	4
NCI-H1666	908473	Y	Y	Y	Y	Y	lung_NSCLC	lung_NSCLC_adenocarcinoma	5
NCI-H1693	687802	Y	Y	Y	Y	Y	lung_NSCLC	lung_NSCLC_adenocarcinoma	3
NCI-H1703	908474	Y	Y	Y	Y	Y	lung_NSCLC	lung_NSCLC_adenocarcinoma	4
NCI-H1734	722058	Y	Y	Y	Y	Y	lung_NSCLC	lung_NSCLC_adenocarcinoma	5
NCI-H1755	908475	Y	Y	Y	Y	Y	lung_NSCLC	lung_NSCLC_adenocarcinoma	4
NCI-H1781	1298350	Y	Y	Y	Y	Y	lung_NSCLC	lung_NSCLC_adenocarcinoma	6
NCI-H1792	724868	Y	Y	Y	Y	Y	lung_NSCLC	lung_NSCLC_adenocarcinoma	3
NCI-H1793	908463	Y	Y	Y	Y	Y	lung_NSCLC	lung_NSCLC_adenocarcinoma	4
NCI-H1838	687807	Y	Y	Y	Y	Y	lung_NSCLC	lung_NSCLC_adenocarcinoma	4
NCI-H1944	1240185	Y	Y	Y	Y	Y	lung_NSCLC	lung_NSCLC_adenocarcinoma	4
NCI-H1975	924244	Y	Y	Y	Y	Y	lung_NSCLC	lung_NSCLC_adenocarcinoma	4
NCI-H1993	908476	Y	Y	Y	Y	Y	lung_NSCLC	lung_NSCLC_adenocarcinoma	6
NCI-H2009	724873	Y	Y	Y	Y	Y	lung_NSCLC	lung_NSCLC_adenocarcinoma	6
NCI-H2023	1240187	Y	Y	Y	Y	Y	lung_NSCLC	lung_NSCLC_adenocarcinoma	4
NCI-H2030	722045	Y	Y	Y	Y	Y	lung_NSCLC	lung_NSCLC_adenocarcinoma	4
NCI-H2085	687812	Y	Y	Y	Y	Y	lung_NSCLC	lung_NSCLC_adenocarcinoma	6
NCI-H2087	724834	Y	Y	Y	Y	Y	lung_NSCLC	lung_NSCLC_adenocarcinoma	5
NCI-H2122	722046	Y	Y	Y	Y	Y	lung_NSCLC	lung_NSCLC_adenocarcinoma	5
NCI-H2228	687816	Y	Y	Y	Y	Y	lung_NSCLC	lung_NSCLC_adenocarcinoma	4
NCI-H2291	724874	Y	Y	Y	Y	Y	lung_NSCLC	lung_NSCLC_adenocarcinoma	4
NCI-H23	905942	Y	Y	Y	Y	Y	lung_NSCLC	lung_NSCLC_adenocarcinoma	4
NCI-H2342	687819	Y	Y	Y	Y	Y	lung_NSCLC	lung_NSCLC_adenocarcinoma	5
NCI-H2347	687820	Y	Y	Y	Y	Y	lung_NSCLC	lung_NSCLC_adenocarcinoma	5
NCI-H2405	687821	Y	Y	Y	Y	Y	lung_NSCLC	lung_NSCLC_adenocarcinoma	4
NCI-H292	753604	Y	Y	Y	Y	Y	lung_NSCLC	lung_NSCLC_adenocarcinoma	5
NCI-H3122	1240190	Y	Y	Y	Y	Y	lung_NSCLC	lung_NSCLC_adenocarcinoma	5
NCI-H322M	905967	Y	Y	Y	Y	Y	lung_NSCLC	lung_NSCLC_adenocarcinoma	5
NCI-H358	908465	Y	Y	Y	Y	Y	lung_NSCLC	lung_NSCLC_adenocarcinoma	6
NCI-H441	908460	Y	Y	Y	Y	Y	lung_NSCLC	lung_NSCLC_adenocarcinoma	5
NCI-H522	905944	Y	Y	Y	Y	Y	lung_NSCLC	lung_NSCLC_adenocarcinoma	2
NCI-H596	908459	Y	Y	Y	Y	Y	lung_NSCLC	lung_NSCLC_adenocarcinoma	4
NCI-H650	722066	Y	Y	Y	Y	Y	lung_NSCLC	lung_NSCLC_adenocarcinoma	4
NCI-H838	910399	Y	Y	Y	Y	Y	lung_NSCLC	lung_NSCLC_adenocarcinoma	4
PC-14	753608	Y	Y	Y	Y	Y	lung_NSCLC	lung_NSCLC_adenocarcinoma	5
RERF-LC-KJ	1298537	Y	Y	Y	Y	Y	lung_NSCLC	lung_NSCLC_adenocarcinoma	6
RERF-LC-MS	910931	Y	Y	Y	Y	Y	lung_NSCLC	lung_NSCLC_adenocarcinoma	4
SK-LU-1	909721	Y	Y	Y	Y	Y	lung_NSCLC	lung_NSCLC_adenocarcinoma	4
SW1573	724878	Y	Y	Y	Y	Y	lung_NSCLC	lung_NSCLC_adenocarcinoma	4
COR-L23	687780	Y	Y	Y	Y	Y	lung_NSCLC	lung_NSCLC_large cell	5
HOP-92	905973	Y	Y	Y	Y	Y	lung_NSCLC	lung_NSCLC_large cell	4
IA-LM	910779	Y	Y	Y	Y	Y	lung_NSCLC	lung_NSCLC_large cell	5
LCLC-103H	753586	Y	Y	Y	Y	Y	lung_NSCLC	lung_NSCLC_large cell	4
LCLC-97TM1	946361	Y	Y	Y	Y	Y	lung_NSCLC	lung_NSCLC_large cell	5
LU-65	724863	Y	Y	Y	Y	Y	lung_NSCLC	lung_NSCLC_large cell	6
LU-99A	907796	Y	Y	Y	Y	Y	lung_NSCLC	lung_NSCLC_large cell	5
NCI-H1155	908467	Y	Y	Y	Y	Y	lung_NSCLC	lung_NSCLC_large cell	2
NCI-H1299	724831	Y	Y	Y	Y	Y	lung_NSCLC	lung_NSCLC_large cell	5
NCI-H1581	908471	Y	Y	Y	Y	Y	lung_NSCLC	lung_NSCLC_large cell	3
NCI-H1915	1240184	Y	Y	Y	Y	Y	lung_NSCLC	lung_NSCLC_large cell	6
NCI-H661	687829	Y	Y	Y	Y	Y	lung_NSCLC	lung_NSCLC_large cell	3
NCI-H810	925341	Y	Y	Y	Y	Y	lung_NSCLC	lung_NSCLC_large cell	2
A427	910851	Y	Y	Y	Y	Y	lung_NSCLC	lung_NSCLC_not specified	5
BEN	753534	Y	Y	Y	Y	Y	lung_NSCLC	lung_NSCLC_not specified	5
CAL-12T	753540	Y	Y	Y	Y	Y	lung_NSCLC	lung_NSCLC_not specified	5
ChaGo-K-1	687596	Y	Y	Y	Y	Y	lung_NSCLC	lung_NSCLC_not specified	5
HCC-366	1240144	Y	Y	Y	Y	Y	lung_NSCLC	lung_NSCLC_not specified	4
NCI-H1770	687804	Y	Y	Y	Y	Y	lung_NSCLC	lung_NSCLC_not specified	2
NCI-H2110	1298351	Y	Y	Y	Y	Y	lung_NSCLC	lung_NSCLC_not specified	5
NCI-H2135	1298352	Y	Y	Y	Y	Y	lung_NSCLC	lung_NSCLC_not specified	5
NCI-H2172	1298353	Y	Y	Y	Y	Y	lung_NSCLC	lung_NSCLC_not specified	5
NCI-H2444	1298356	Y	Y	Y	Y	Y	lung_NSCLC	lung_NSCLC_not specified	5
NCI-H647	1240191	Y	Y	Y	Y	Y	lung_NSCLC	lung_NSCLC_not specified	4
EBC-1	753554	Y	Y	Y	Y	Y	lung_NSCLC	lung_NSCLC_squamous_cell_carcinoma	5
EPLC-272H	753556	Y	Y	Y	Y	Y	lung_NSCLC	lung_NSCLC_squamous_cell_carcinoma	5
HARA	1240142	Y	Y	Y	Y	Y	lung_NSCLC	lung_NSCLC_squamous_cell_carcinoma	5
HCC-15	1240143	Y	Y	Y	Y	Y	lung_NSCLC	lung_NSCLC_squamous_cell_carcinoma	4
KNS-62	753569	Y	Y	Y	Y	Y	lung_NSCLC	lung_NSCLC_squamous_cell_carcinoma	5
LC-1-sq	1298223	Y	Y	Y	Y	Y	lung_NSCLC	lung_NSCLC_squamous_cell_carcinoma	5
LK-2	687787	Y	Y	Y	Y	Y	lung_NSCLC	lung_NSCLC_squamous_cell_carcinoma	5
LOU-NH91	1298226	Y	Y	Y	Y	Y	lung_NSCLC	lung_NSCLC_squamous_cell_carcinoma	4
NCI-H1869	1240183	Y	Y	Y	Y	Y	lung_NSCLC	lung_NSCLC_squamous_cell_carcinoma	5
NCI-H2170	687815	Y	Y	Y	Y	Y	lung_NSCLC	lung_NSCLC_squamous_cell_carcinoma	5
NCI-H226	905941	Y	Y	Y	Y	Y	lung_NSCLC	lung_NSCLC_squamous_cell_carcinoma	4
NCI-H520	908443	Y	Y	Y	Y	Y	lung_NSCLC	lung_NSCLC_squamous_cell_carcinoma	5
RERF-LC-Sq1	1298538	Y	Y	Y	Y	Y	lung_NSCLC	lung_NSCLC_squamous_cell_carcinoma	5
SK-MES-1	909728	Y	Y	Y	Y	Y	lung_NSCLC	lung_NSCLC_squamous_cell_carcinoma	4
SW900	724879	Y	Y	Y	Y	Y	lung_NSCLC	lung_NSCLC_squamous_cell_carcinoma	4
COLO-668	910692	Y	Y	Y	Y	Y	lung_SCLC	lung_small_cell_carcinoma	2
COR-L279	910937	Y	Y	Y	Y	Y	lung_SCLC	lung_small_cell_carcinoma	2
COR-L303	1297438	Y	Y	Y	Y	Y	lung_SCLC	lung_small_cell_carcinoma	2
COR-L311	687980	Y	Y	Y	Y	Y	lung_SCLC	lung_small_cell_carcinoma	2
COR-L88	906808	Y	Y	Y	Y	Y	lung_SCLC	lung_small_cell_carcinoma	2
CPC-N	753547	Y	Y	Y	Y	Y	lung_SCLC	lung_small_cell_carcinoma	2
DMS-114	687983	Y	Y	Y	Y	Y	lung_SCLC	lung_small_cell_carcinoma	2
DMS-273	687985	Y	Y	Y	Y	Y	lung_SCLC	lung_small_cell_carcinoma	2
DMS-53	907295	Y	Y	Y	Y	Y	lung_SCLC	lung_small_cell_carcinoma	5
IST-SL1	753564	Y	Y	Y	Y	Y	lung_SCLC	lung_small_cell_carcinoma	2
IST-SL2	753565	Y	Y	Y	Y	Y	lung_SCLC	lung_small_cell_carcinoma	5
LB647-SCLC	753582	Y	Y	Y	Y	Y	lung_SCLC	lung_small_cell_carcinoma	2
LU-134-A	753588	Y	Y	Y	Y	Y	lung_SCLC	lung_small_cell_carcinoma	2
LU-135	713899	Y	Y	Y	Y	Y	lung_SCLC	lung_small_cell_carcinoma	2
LU-139	713878	Y	Y	Y	Y	Y	lung_SCLC	lung_small_cell_carcinoma	2
LU-165	753589	Y	Y	Y	Y	Y	lung_SCLC	lung_small_cell_carcinoma	2
MS-1	753594	Y	Y	Y	Y	Y	lung_SCLC	lung_small_cell_carcinoma	2
NCI-H1048	687995	Y	Y	Y	Y	Y	lung_SCLC	lung_small_cell_carcinoma	5
NCI-H1092	687997	Y	Y	Y	Y	Y	lung_SCLC	lung_small_cell_carcinoma	2
NCI-H1105	908468	Y	Y	Y	Y	Y	lung_SCLC	lung_small_cell_carcinoma	2
NCI-H1341	1330964	Y	Y	Y	Y	Y	lung_SCLC	lung_small_cell_carcinoma	2
NCI-H1417	688001	Y	Y	Y	Y	Y	lung_SCLC	lung_small_cell_carcinoma	2
NCI-H1436	908469	Y	Y	Y	Y	Y	lung_SCLC	lung_small_cell_carcinoma	2
NCI-H146	910899	Y	Y	Y	Y	Y	lung_SCLC	lung_small_cell_carcinoma	2
NCI-H1688	1298349	Y	Y	Y	Y	Y	lung_SCLC	lung_small_cell_carcinoma	5
NCI-H1694	688006	Y	Y	Y	Y	Y	lung_SCLC	lung_small_cell_carcinoma	2
NCI-H1836	1240182	Y	Y	Y	Y	Y	lung_SCLC	lung_small_cell_carcinoma	2
NCI-H187	688007	Y	Y	Y	Y	Y	lung_SCLC	lung_small_cell_carcinoma	2
NCI-H1876	1330972	Y	Y	Y	Y	Y	lung_SCLC	lung_small_cell_carcinoma	2
NCI-H196	1240186	Y	Y	Y	Y	Y	lung_SCLC	lung_small_cell_carcinoma	3
NCI-H1963	688010	Y	Y	Y	Y	Y	lung_SCLC	lung_small_cell_carcinoma	2
NCI-H2029	688011	Y	Y	Y	Y	Y	lung_SCLC	lung_small_cell_carcinoma	2
NCI-H2066	1330973	Y	Y	Y	Y	Y	lung_SCLC	lung_small_cell_carcinoma	4
NCI-H209	688013	Y	Y	Y	Y	Y	lung_SCLC	lung_small_cell_carcinoma	2
NCI-H211	1240189	Y	Y	Y	Y	Y	lung_SCLC	lung_small_cell_carcinoma	5
NCI-H2141	688014	Y	Y	Y	Y	Y	lung_SCLC	lung_small_cell_carcinoma	2
NCI-H2196	908481	Y	Y	Y	Y	Y	lung_SCLC	lung_small_cell_carcinoma	2
NCI-H2227	688018	Y	Y	Y	Y	Y	lung_SCLC	lung_small_cell_carcinoma	2
NCI-H345	688021	Y	Y	Y	Y	Y	lung_SCLC	lung_small_cell_carcinoma	2
NCI-H446	688023	Y	Y	Y	Y	Y	lung_SCLC	lung_small_cell_carcinoma	2
NCI-H510A	753605	Y	Y	Y	Y	Y	lung_SCLC	lung_small_cell_carcinoma	2
NCI-H524	908483	Y	Y	Y	Y	Y	lung_SCLC	lung_small_cell_carcinoma	2
NCI-H526	688025	Y	Y	Y	Y	Y	lung_SCLC	lung_small_cell_carcinoma	2
NCI-H64	688026	Y	Y	Y	Y	Y	lung_SCLC	lung_small_cell_carcinoma	2
NCI-H69	688027	Y	Y	Y	Y	Y	lung_SCLC	lung_small_cell_carcinoma	2
NCI-H748	909194	Y	Y	Y	Y	Y	lung_SCLC	lung_small_cell_carcinoma	2
NCI-H82	688031	Y	Y	Y	Y	Y	lung_SCLC	lung_small_cell_carcinoma	2
NCI-H841	1240192	Y	Y	Y	Y	Y	lung_SCLC	lung_small_cell_carcinoma	5
NCI-H847	1240193	Y	Y	Y	Y	Y	lung_SCLC	lung_small_cell_carcinoma	2
SBC-1	713885	Y	Y	Y	Y	Y	lung_SCLC	lung_small_cell_carcinoma	2
SBC-3	753610	Y	Y	Y	Y	Y	lung_SCLC	lung_small_cell_carcinoma	5
SBC-5	713880	Y	Y	Y	Y	Y	lung_SCLC	lung_small_cell_carcinoma	5
H2369	1290808	Y	Y	Y	Y	Y	lung	mesothelioma	4
H2373	1290809	Y	Y	Y	Y	Y	lung	mesothelioma	4
H2461	1290810	Y	Y	Y	Y	Y	lung	mesothelioma	3
H2591	1240131	Y	Y	Y	Y	Y	lung	mesothelioma	4
H2595	1240132	Y	Y	Y	Y	Y	lung	mesothelioma	4
H2722	1290812	Y	Y	Y	Y	Y	lung	mesothelioma	4
H2731	1240134	Y	Y	Y	Y	Y	lung	mesothelioma	4
H2795	1290813	Y	Y	Y	Y	Y	lung	mesothelioma	4
H2803	1240135	Y	Y	Y	Y	Y	lung	mesothelioma	4
H2804	1240136	Y	Y	Y	Y	Y	lung	mesothelioma	4
H2818	1290814	Y	Y	Y	Y	Y	lung	mesothelioma	4
H2869	1240138	Y	Y	Y	Y	Y	lung	mesothelioma	3
H290	1240139	Y	Y	Y	Y	Y	lung	mesothelioma	3
H513	1240141	Y	Y	Y	Y	Y	lung	mesothelioma	5
IST-MES1	907173	Y	Y	Y	Y	Y	lung	mesothelioma	4
MPP-89	908150	Y	Y	Y	Y	Y	lung	mesothelioma	3
MSTO-211H	908152	Y	Y	Y	Y	Y	lung	mesothelioma	4
NCI-H2052	688058	Y	Y	Y	Y	Y	lung	mesothelioma	4
NCI-H2452	908462	Y	Y	Y	Y	Y	lung	mesothelioma	4
NCI-H28	908470	Y	Y	Y	Y	Y	lung	mesothelioma	4
42-MG-BA	687561	Y	Y	Y	Y	Y	nervous_system	glioma	3
8-MG-BA	687562	Y	Y	Y	Y	Y	nervous_system	glioma	4
A172	687563	Y	Y	Y	Y	Y	nervous_system	glioma	4
AM-38	910933	Y	Y	Y	Y	Y	nervous_system	glioma	4
Becker	906746	Y	Y	Y	Y	Y	nervous_system	glioma	4
CAS-1	910943	Y	Y	Y	Y	Y	nervous_system	glioma	3
CCF-STTG1	906823	Y	Y	Y	Y	Y	nervous_system	glioma	3
D-247MG	946367	Y	Y	Y	Y	Y	nervous_system	glioma	4
D-263MG	946368	Y	Y	Y	Y	Y	nervous_system	glioma	3
D-336MG	946369	Y	Y	Y	Y	Y	nervous_system	glioma	3
D-392MG	946370	Y	Y	Y	Y	Y	nervous_system	glioma	3
D-502MG	946373	Y	Y	Y	Y	Y	nervous_system	glioma	3
D-542MG	753549	Y	Y	Y	Y	Y	nervous_system	glioma	3
D-566MG	946377	Y	Y	Y	Y	Y	nervous_system	glioma	3
DBTRG-05MG	906835	Y	Y	Y	Y	Y	nervous_system	glioma	3
DK-MG	906839	Y	Y	Y	Y	Y	nervous_system	glioma	3
GAMG	906868	Y	Y	Y	Y	Y	nervous_system	glioma	4
GB-1	687568	Y	Y	Y	Y	Y	nervous_system	glioma	3
GI-1	906871	Y	Y	Y	Y	Y	nervous_system	glioma	3
GMS-10	906873	Y	Y	Y	Y	Y	nervous_system	glioma	3
H4	907042	Y	Y	Y	Y	Y	nervous_system	glioma	3
Hs683	1240150	Y	Y	Y	Y	Y	nervous_system	glioma	3
KALS-1	907271	Y	Y	Y	Y	Y	nervous_system	glioma	3
KINGS-1	907279	Y	Y	Y	Y	Y	nervous_system	glioma	4
KNS-42	907282	Y	Y	Y	Y	Y	nervous_system	glioma	3
KNS-81-FD	924188	Y	Y	Y	Y	Y	nervous_system	glioma	3
KS-1	907313	Y	Y	Y	Y	Y	nervous_system	glioma	3
LN-18	1240168	Y	Y	Y	Y	Y	nervous_system	glioma	4
LN-229	1240169	Y	Y	Y	Y	Y	nervous_system	glioma	3
LN-405	910694	Y	Y	Y	Y	Y	nervous_system	glioma	3
LNZTA3WT4	1240170	Y	Y	Y	Y	Y	nervous_system	glioma	3
M059J	949094	Y	Y	Y	Y	Y	nervous_system	glioma	3
MOG-G-CCM	908144	Y	Y	Y	Y	Y	nervous_system	glioma	3
MOG-G-UVW	908145	Y	Y	Y	Y	Y	nervous_system	glioma	3
NMC-G1	908449	Y	Y	Y	Y	Y	nervous_system	glioma	3
no-10	908452	Y	Y	Y	Y	Y	nervous_system	glioma	4
no-11	908450	Y	Y	Y	Y	Y	nervous_system	glioma	4
SF126	909712	Y	Y	Y	Y	Y	nervous_system	glioma	3
SF268	905986	Y	Y	Y	Y	Y	nervous_system	glioma	4
SF295	905985	Y	Y	Y	Y	Y	nervous_system	glioma	4
SF539	905984	Y	Y	Y	Y	Y	nervous_system	glioma	3
SK-MG-1	909729	Y	Y	Y	Y	Y	nervous_system	glioma	4
SNB75	905982	Y	Y	Y	Y	Y	nervous_system	glioma	3
SW1088	909745	Y	Y	Y	Y	Y	nervous_system	glioma	3
SW1783	909750	Y	Y	Y	Y	Y	nervous_system	glioma	3
T98G	687586	Y	Y	Y	Y	Y	nervous_system	glioma	4
U-118-MG	687588	Y	Y	Y	Y	Y	nervous_system	glioma	3
U251	905983	Y	Y	Y	Y	Y	nervous_system	glioma	3
U-87-MG	687590	Y	Y	Y	Y	Y	nervous_system	glioma	4
YH-13	909905	Y	Y	Y	Y	Y	nervous_system	glioma	3
YKG-1	687592	Y	Y	Y	Y	Y	nervous_system	glioma	4
BE2-M17	753616	Y	Y	Y	Y	Y	neuroblastoma	neuroblastoma	2
CHP-126	910567	Y	Y	Y	Y	Y	neuroblastoma	neuroblastoma	2
CHP-134	910941	Y	Y	Y	Y	Y	neuroblastoma	neuroblastoma	2
CHP-212	906820	Y	Y	Y	Y	Y	neuroblastoma	neuroblastoma	2
GI-ME-N	906872	Y	Y	Y	Y	Y	neuroblastoma	neuroblastoma	3
GOTO	906875	Y	Y	Y	Y	Y	neuroblastoma	neuroblastoma	2
IMR-5	907170	Y	Y	Y	Y	Y	neuroblastoma	neuroblastoma	2
KELLY	753618	Y	Y	Y	Y	Y	neuroblastoma	neuroblastoma	2
KP-N-YN	907314	Y	Y	Y	Y	Y	neuroblastoma	neuroblastoma	2
LAN-6	949170	Y	Y	Y	Y	Y	neuroblastoma	neuroblastoma	2
MHH-NB-11	908135	Y	Y	Y	Y	Y	neuroblastoma	neuroblastoma	2
NB(TU)1-10	1240181	Y	Y	Y	Y	Y	neuroblastoma	neuroblastoma	2
NB1	949179	Y	Y	Y	Y	Y	neuroblastoma	neuroblastoma	2
NB10	949171	Y	Y	Y	Y	Y	neuroblastoma	neuroblastoma	2
NB12	949172	Y	Y	Y	Y	Y	neuroblastoma	neuroblastoma	5
NB13	949177	Y	Y	Y	Y	Y	neuroblastoma	neuroblastoma	2
NB14	949178	Y	Y	Y	Y	Y	neuroblastoma	neuroblastoma	2
NB17	949175	Y	Y	Y	Y	Y	neuroblastoma	neuroblastoma	2
NB5	949176	Y	Y	Y	Y	Y	neuroblastoma	neuroblastoma	2
NB6	949173	Y	Y	Y	Y	Y	neuroblastoma	neuroblastoma	2
NB69	908440	Y	Y	Y	Y	Y	neuroblastoma	neuroblastoma	2
NB7	949174	Y	Y	Y	Y	Y	neuroblastoma	neuroblastoma	2
NH-12	908447	Y	Y	Y	Y	Y	neuroblastoma	neuroblastoma	2
SIMA	753620	Y	Y	Y	Y	Y	neuroblastoma	neuroblastoma	2
SK-N-AS	724828	Y	Y	Y	Y	Y	neuroblastoma	neuroblastoma	2
SK-N-DZ	688086	Y	Y	Y	Y	Y	neuroblastoma	neuroblastoma	2
SK-N-FI	688087	Y	Y	Y	Y	Y	neuroblastoma	neuroblastoma	2
SK-N-SH	717431	Y	Y	Y	Y	Y	neuroblastoma	neuroblastoma	3
TGW	910780	Y	Y	Y	Y	Y	neuroblastoma	neuroblastoma	2
AsPC-1	910702	Y	Y	Y	Y	Y	pancreas	pancreas	6
BxPC-3	906693	Y	Y	Y	Y	Y	pancreas	pancreas	5
CAPAN-1	753624	Y	Y	Y	Y	Y	pancreas	pancreas	5
Capan-2	910915	Y	Y	Y	Y	Y	pancreas	pancreas	5
CFPAC-1	906821	Y	Y	Y	Y	Y	pancreas	pancreas	5
DAN-G	1290797	Y	Y	Y	Y	Y	pancreas	pancreas	5
HPAC	1298136	Y	Y	Y	Y	Y	pancreas	pancreas	5
HPAF-II	724869	Y	Y	Y	Y	Y	pancreas	pancreas	5
Hs766T	1298141	Y	Y	Y	Y	Y	pancreas	pancreas	6
HuP-T3	907285	Y	Y	Y	Y	Y	pancreas	pancreas	5
HuP-T4	907286	Y	Y	Y	Y	Y	pancreas	pancreas	5
KP-1N	1298216	Y	Y	Y	Y	Y	pancreas	pancreas	4
KP-3	1298219	Y	Y	Y	Y	Y	pancreas	pancreas	5
KP-4	753572	Y	Y	Y	Y	Y	pancreas	pancreas	4
MIA-PaCa-2	724870	Y	Y	Y	Y	Y	pancreas	pancreas	5
MZ1-PC	753595	Y	Y	Y	Y	Y	pancreas	pancreas	6
PANC-02-03	1298475	Y	Y	Y	Y	Y	pancreas	pancreas	5
PANC-03-27	925346	Y	Y	Y	Y	Y	pancreas	pancreas	4
PANC-04-03	1298476	Y	Y	Y	Y	Y	pancreas	pancreas	5
PANC-08-13	925347	Y	Y	Y	Y	Y	pancreas	pancreas	5
PANC-10-05	925348	Y	Y	Y	Y	Y	pancreas	pancreas	5
PA-TU-8902	1298526	Y	Y	Y	Y	Y	pancreas	pancreas	5
PA-TU-8988T	1240201	Y	Y	Y	Y	Y	pancreas	pancreas	4
PL18	1240208	Y	Y	Y	Y	Y	pancreas	pancreas	4
PL4	1298533	Y	Y	Y	Y	Y	pancreas	pancreas	5
PSN1	910546	Y	Y	Y	Y	Y	pancreas	pancreas	4
QGP-1	1298534	Y	Y	Y	Y	Y	pancreas	pancreas	5
SU8686	1240218	Y	Y	Y	Y	Y	pancreas	pancreas	6
SUIT-2	1240219	Y	Y	Y	Y	Y	pancreas	pancreas	6
SW1990	910907	Y	Y	Y	Y	Y	pancreas	pancreas	5
YAPC	909904	Y	Y	Y	Y	Y	pancreas	pancreas	4
451Lu	1287706	Y	Y	Y	Y	Y	skin	melanoma	3
A101D	910921	Y	Y	Y	Y	Y	skin	melanoma	3
A2058	906792	Y	Y	Y	Y	Y	skin	melanoma	3
A375	906793	Y	Y	Y	Y	Y	skin	melanoma	3
C32	906830	Y	Y	Y	Y	Y	skin	melanoma	3
CHL-1	910853	Y	Y	Y	Y	Y	skin	melanoma	3
COLO-679	906818	Y	Y	Y	Y	Y	skin	melanoma	3
COLO-792	906814	Y	Y	Y	Y	Y	skin	melanoma	3
COLO-800	906813	Y	Y	Y	Y	Y	skin	melanoma	3
COLO-829	687448	Y	Y	Y	Y	Y	skin	melanoma	3
CP50-MEL-B	753545	Y	Y	Y	Y	Y	skin	melanoma	3
CP66-MEL	753546	Y	Y	Y	Y	Y	skin	melanoma	3
G-361	906865	Y	Y	Y	Y	Y	skin	melanoma	3
GAK	910932	Y	Y	Y	Y	Y	skin	melanoma	3
G-MEL	1240130	Y	Y	Y	Y	Y	skin	melanoma	3
HMV-II	907058	Y	Y	Y	Y	Y	skin	melanoma	3
Hs940-T	1298145	Y	Y	Y	Y	Y	skin	melanoma	4
HT-144	907067	Y	Y	Y	Y	Y	skin	melanoma	3
IGR-1	907169	Y	Y	Y	Y	Y	skin	melanoma	3
IGR-37	1240153	Y	Y	Y	Y	Y	skin	melanoma	3
IPC-298	907171	Y	Y	Y	Y	Y	skin	melanoma	3
IST-MEL1	907172	Y	Y	Y	Y	Y	skin	melanoma	3
LB2518-MEL	753579	Y	Y	Y	Y	Y	skin	melanoma	3
LB373-MEL-D	753581	Y	Y	Y	Y	Y	skin	melanoma	3
LOXIMVI	905974	Y	Y	Y	Y	Y	skin	melanoma	4
M14	905975	Y	Y	Y	Y	Y	skin	melanoma	3
MEL-HO	908124	Y	Y	Y	Y	Y	skin	melanoma	3
MEL-JUSO	908125	Y	Y	Y	Y	Y	skin	melanoma	3
Mewo	908128	Y	Y	Y	Y	Y	skin	melanoma	3
MMAC-SF	925339	Y	Y	Y	Y	Y	skin	melanoma	3
MZ2-MEL	971777	Y	Y	Y	Y	Y	skin	melanoma	3
MZ7-mel	753596	Y	Y	Y	Y	Y	skin	melanoma	3
RPMI-7951	910903	Y	Y	Y	Y	Y	skin	melanoma	3
RVH-421	909706	Y	Y	Y	Y	Y	skin	melanoma	3
SH-4	909713	Y	Y	Y	Y	Y	skin	melanoma	3
SK-MEL-1	909723	Y	Y	Y	Y	Y	skin	melanoma	3
SK-MEL-2	905955	Y	Y	Y	Y	Y	skin	melanoma	3
SK-MEL-24	909725	Y	Y	Y	Y	Y	skin	melanoma	3
SK-MEL-28	905954	Y	Y	Y	Y	Y	skin	melanoma	3
SK-MEL-3	909724	Y	Y	Y	Y	Y	skin	melanoma	3
SK-MEL-30	909726	Y	Y	Y	Y	Y	skin	melanoma	3
SK-MEL-31	909727	Y	Y	Y	Y	Y	skin	melanoma	3
SK-MEL-5	905956	Y	Y	Y	Y	Y	skin	melanoma	3
UACC-257	905977	Y	Y	Y	Y	Y	skin	melanoma	3
UACC-62	905976	Y	Y	Y	Y	Y	skin	melanoma	3
WM-115	909784	Y	Y	Y	Y	Y	skin	melanoma	3
WM1552C	1299078	Y	Y	Y	Y	Y	skin	melanoma	3
WM278	1240226	Y	Y	Y	Y	Y	skin	melanoma	3
WM35	1299080	Y	Y	Y	Y	Y	skin	melanoma	3
WM793B	1299081	Y	Y	Y	Y	Y	skin	melanoma	3
A204	910784	Y	Y	Y	Y	Y	soft_tissue	rhabdomyosarcoma	2
A673	684052	Y	Y	Y	Y	Y	soft_tissue	rhabdomyosarcoma	2
KYM-1	1240166	Y	Y	Y	Y	Y	soft_tissue	rhabdomyosarcoma	6
RD	909264	Y	Y	Y	Y	Y	soft_tissue	rhabdomyosarcoma	4
RH-1	971773	Y	Y	Y	Y	Y	soft_tissue	rhabdomyosarcoma	2
RH-18	971774	Y	Y	Y	Y	Y	soft_tissue	rhabdomyosarcoma	2
RH-41	1240210	Y	Y	Y	Y	Y	soft_tissue	rhabdomyosarcoma	2
SJRH30	909716	Y	Y	Y	Y	Y	soft_tissue	rhabdomyosarcoma	2
TE-441-T	924248	Y	Y	Y	Y	Y	soft_tissue	rhabdomyosarcoma	6
G-402	907298	Y	Y	Y	Y	Y	soft_tissue	soft_tissue_other	5
GCT	906999	Y	Y	Y	Y	Y	soft_tissue	soft_tissue_other	4
MFH-ino	925343	Y	Y	Y	Y	Y	soft_tissue	soft_tissue_other	3
SK-LMS-1	909720	Y	Y	Y	Y	Y	soft_tissue	soft_tissue_other	4
SK-UT-1	909732	Y	Y	Y	Y	Y	soft_tissue	soft_tissue_other	4
SW872	909756	Y	Y	Y	Y	Y	soft_tissue	soft_tissue_other	3
SW982	909759	Y	Y	Y	Y	Y	soft_tissue	soft_tissue_other	3
VA-ES-BJ	688121	Y	Y	Y	Y	Y	soft_tissue	soft_tissue_other	4
8305C	906795	Y	Y	Y	Y	Y	thyroid	thyroid	4
8505C	924102	Y	Y	Y	Y	Y	thyroid	thyroid	4
ASH-3	1290722	Y	Y	Y	Y	Y	thyroid	thyroid	3
BCPAP	924104	Y	Y	Y	Y	Y	thyroid	thyroid	4
BHT-101	906696	Y	Y	Y	Y	Y	thyroid	thyroid	4
CAL-62	906828	Y	Y	Y	Y	Y	thyroid	thyroid	4
CGTH-W-1	910568	Y	Y	Y	Y	Y	thyroid	thyroid	4
FTC-133	906864	Y	Y	Y	Y	Y	thyroid	thyroid	4
HTC-C3	924151	Y	Y	Y	Y	Y	thyroid	thyroid	4
IHH-4	1240154	Y	Y	Y	Y	Y	thyroid	thyroid	4
K5	924238	Y	Y	Y	Y	Y	thyroid	thyroid	4
ML-1	1240178	Y	Y	Y	Y	Y	thyroid	thyroid	4
RO82-W-1	930083	Y	Y	Y	Y	Y	thyroid	thyroid	3
TT	930299	Y	Y	Y	Y	Y	thyroid	thyroid	5
TT2609-C02	1240223	Y	Y	Y	Y	Y	thyroid	thyroid	4
5637	687452	Y	Y	Y	Y	Y	urogenital_system	Bladder	5
639-V	906798	Y	Y	Y	Y	Y	urogenital_system	Bladder	4
647-V	906797	Y	Y	Y	Y	Y	urogenital_system	Bladder	4
BFTC-905	910926	Y	Y	Y	Y	Y	urogenital_system	Bladder	6
CAL-29	1290730	Y	Y	Y	Y	Y	urogenital_system	Bladder	5
DSH1	753552	Y	Y	Y	Y	Y	urogenital_system	Bladder	5
HT-1197	907065	Y	Y	Y	Y	Y	urogenital_system	Bladder	6
HT-1376	907066	Y	Y	Y	Y	Y	urogenital_system	Bladder	5
J82	753566	Y	Y	Y	Y	Y	urogenital_system	Bladder	4
KU-19-19	907312	Y	Y	Y	Y	Y	urogenital_system	Bladder	6
LB831-BLC	753584	Y	Y	Y	Y	Y	urogenital_system	Bladder	3
RT-112	909704	Y	Y	Y	Y	Y	urogenital_system	Bladder	6
RT4	687455	Y	Y	Y	Y	Y	urogenital_system	Bladder	5
SW1710	909749	Y	Y	Y	Y	Y	urogenital_system	Bladder	4
SW780	687457	Y	Y	Y	Y	Y	urogenital_system	Bladder	6
T-24	724812	Y	Y	Y	Y	Y	urogenital_system	Bladder	4
TCCSUP	687459	Y	Y	Y	Y	Y	urogenital_system	Bladder	3
UM-UC-3	724838	Y	Y	Y	Y	Y	urogenital_system	Bladder	4
VM-CUB-1	909780	Y	Y	Y	Y	Y	urogenital_system	Bladder	5
C-33-A	687505	Y	Y	Y	Y	Y	urogenital_system	cervix	5
C-4-I	687506	Y	Y	Y	Y	Y	urogenital_system	cervix	5
CAL-39	924107	Y	Y	Y	Y	Y	urogenital_system	cervix	6
Ca-Ski	906824	Y	Y	Y	Y	Y	urogenital_system	cervix	5
DoTc2-4510	906843	Y	Y	Y	Y	Y	urogenital_system	cervix	6
HeLa	1298134	Y	Y	Y	Y	Y	urogenital_system	cervix	4
HT-3	907068	Y	Y	Y	Y	Y	urogenital_system	cervix	5
ME-180	687514	Y	Y	Y	Y	Y	urogenital_system	cervix	6
MS751	1240179	Y	Y	Y	Y	Y	urogenital_system	cervix	5
SiHa	930297	Y	Y	Y	Y	Y	urogenital_system	cervix	4
SISO	1240212	Y	Y	Y	Y	Y	urogenital_system	cervix	6
SKG-IIIa	930298	Y	Y	Y	Y	Y	urogenital_system	cervix	5
SW756	724839	Y	Y	Y	Y	Y	urogenital_system	cervix	4
TC-YIK	946357	Y	Y	Y	Y	Y	urogenital_system	cervix	2
AN3-CA	910781	Y	Y	Y	Y	Y	urogenital_system	endometrium	5
COLO-684	910691	Y	Y	Y	Y	Y	urogenital_system	endometrium	2
EN	1240127	Y	Y	Y	Y	Y	urogenital_system	endometrium	5
ESS-1	907000	Y	Y	Y	Y	Y	urogenital_system	endometrium	4
HEC-1	907051	Y	Y	Y	Y	Y	urogenital_system	endometrium	4
KLE	924187	Y	Y	Y	Y	Y	urogenital_system	endometrium	5
MFE-280	908129	Y	Y	Y	Y	Y	urogenital_system	endometrium	5
MFE-296	908130	Y	Y	Y	Y	Y	urogenital_system	endometrium	3
MFE-319	1240174	Y	Y	Y	Y	Y	urogenital_system	endometrium	4
SNG-M	909735	Y	Y	Y	Y	Y	urogenital_system	endometrium	4
A2780	906804	Y	Y	Y	Y	Y	urogenital_system	ovary	2
Caov-4	949090	Y	Y	Y	Y	Y	urogenital_system	ovary	5
EFO-21	911905	Y	Y	Y	Y	Y	urogenital_system	ovary	6
EFO-27	906852	Y	Y	Y	Y	Y	urogenital_system	ovary	5
ES-2	1240128	Y	Y	Y	Y	Y	urogenital_system	ovary	4
FU-OV-1	1240129	Y	Y	Y	Y	Y	urogenital_system	ovary	4
IGROV-1	905968	Y	Y	Y	Y	Y	urogenital_system	ovary	4
JHOS-2	1479995	Y	Y	Y	Y	Y	urogenital_system	ovary	5
JHOS-3	1480358	Y	Y	Y	Y	Y	urogenital_system	ovary	6
JHOS-4	1480359	Y	Y	Y	Y	Y	urogenital_system	ovary	5
KGN	924186	Y	Y	Y	Y	Y	urogenital_system	ovary	4
KURAMOCHI	909975	Y	Y	Y	Y	Y	urogenital_system	ovary	4
OAW-28	946360	Y	Y	Y	Y	Y	urogenital_system	ovary	5
OAW-42	910548	Y	Y	Y	Y	Y	urogenital_system	ovary	4
OC-314	909257	Y	Y	Y	Y	Y	urogenital_system	ovary	4
OV-17R	1480361	Y	Y	Y	Y	Y	urogenital_system	ovary	5
OV-56	1480362	Y	Y	Y	Y	Y	urogenital_system	ovary	4
OV-7	1480360	Y	Y	Y	Y	Y	urogenital_system	ovary	3
OV-90	1240197	Y	Y	Y	Y	Y	urogenital_system	ovary	6
OVCA420	1480364	Y	Y	Y	Y	Y	urogenital_system	ovary	5
OVCAR-3	905933	Y	Y	Y	Y	Y	urogenital_system	ovary	5
OVCAR-4	905990	Y	Y	Y	Y	Y	urogenital_system	ovary	5
OVCAR-5	905969	Y	Y	Y	Y	Y	urogenital_system	ovary	5
OVCAR-8	905991	Y	Y	Y	Y	Y	urogenital_system	ovary	4
OVISE	1240198	Y	Y	Y	Y	Y	urogenital_system	ovary	5
OVK-18	1480371	Y	Y	Y	Y	Y	urogenital_system	ovary	5
OVKATE	1240199	Y	Y	Y	Y	Y	urogenital_system	ovary	6
OVMIU	1240200	Y	Y	Y	Y	Y	urogenital_system	ovary	5
OVTOKO	1298365	Y	Y	Y	Y	Y	urogenital_system	ovary	6
PA-1	909255	Y	Y	Y	Y	Y	urogenital_system	ovary	5
PEO1	1480372	Y	Y	Y	Y	Y	urogenital_system	ovary	5
RKN	1298539	Y	Y	Y	Y	Y	urogenital_system	ovary	4
RMG-I	909699	Y	Y	Y	Y	Y	urogenital_system	ovary	6
SK-OV-3	905959	Y	Y	Y	Y	Y	urogenital_system	ovary	6
SW626	909753	Y	Y	Y	Y	Y	urogenital_system	ovary	5
TOV-112D	1299070	Y	Y	Y	Y	Y	urogenital_system	ovary	2
TOV-21G	1240222	Y	Y	Y	Y	Y	urogenital_system	ovary	4
TYK-nu	909774	Y	Y	Y	Y	Y	urogenital_system	ovary	5
UWB1.289	1480374	Y	Y	Y	Y	Y	urogenital_system	ovary	6
22RV1	924100	Y	Y	Y	Y	Y	urogenital_system	prostate	5
BPH-1	924105	Y	Y	Y	Y	Y	urogenital_system	prostate	5
DU-145	905935	Y	Y	Y	Y	Y	urogenital_system	prostate	4
LNCaP-Clone-FGC	907788	Y	Y	Y	Y	Y	urogenital_system	prostate	5
PC-3	905934	Y	Y	Y	Y	Y	urogenital_system	prostate	5
PWR-1E	1330993	Y	Y	Y	Y	Y	urogenital_system	prostate	4
VCaP	1299075	Y	Y	Y	Y	Y	urogenital_system	prostate	5
DMS-79	753551	Y	Y	Y	Y	Y	lung_SCLC	lung_small_cell_carcinoma	2
CMK	910566	Y	Y	Y	N	Y	leukemia	acute_myeloid_leukaemia	1
NB-4	1323913	Y	Y	Y	N	Y	leukemia	acute_myeloid_leukaemia	1
JM1	1327768	Y	Y	Y	N	Y	lymphoma	B_cell_lymphoma	1
ES6	949157	Y	Y	Y	N	Y	bone	ewings_sarcoma	3
SW620	905962	Y	Y	Y	N	Y	large_intestine	large_intestine	6
JHH-2	1240157	Y	N	Y	Y	Y	digestive_system	liver	6
JHH-4	1240158	Y	N	Y	Y	Y	digestive_system	liver	4
RCC-JF	1524415	Y	Y	Y	N	Y	kidney	kidney	4
SW156	1240220	Y	N	Y	Y	Y	kidney	kidney	4
HOP-62	905972	Y	Y	Y	N	Y	lung_NSCLC	lung_NSCLC_adenocarcinoma	3
PC-3 [JPC-3]	1240202	Y	Y	Y	N	Y	lung_NSCLC	lung_NSCLC_adenocarcinoma	5
COR-L95	1297439	Y	Y	Y	N	Y	lung_SCLC	lung_small_cell_carcinoma	2
NCI-H1304	753599	Y	Y	Y	N	Y	lung_SCLC	lung_small_cell_carcinoma	2
SHP-77	724872	Y	Y	Y	N	Y	lung_SCLC	lung_small_cell_carcinoma	5
SW1271	1299062	Y	Y	Y	N	Y	lung_SCLC	lung_small_cell_carcinoma	4
D-423MG	946372	Y	Y	Y	N	Y	nervous_system	glioma	4
COLO-783	1240125	Y	Y	Y	N	Y	skin	melanoma	3
RL95-2	930082	Y	Y	Y	N	Y	urogenital_system	endometrium	5
DOV13	1479987	Y	Y	Y	N	Y	urogenital_system	ovary	4
Hey	1479988	Y	Y	Y	N	Y	urogenital_system	ovary	4
JHU-029	1298156	Y	Y	Y	N	Y	aero_dig_tract	head and neck	6
SCC90	1299052	Y	Y	Y	N	Y	aero_dig_tract	head and neck	5
MOLM-16	1330948	Y	Y	Y	N	Y	leukemia	acute_myeloid_leukaemia	1
OCI-LY7	1659819	Y	Y	Y	N	Y	lymphoma	B_cell_lymphoma	1
KMS-11	1659817	Y	Y	Y	N	Y	myeloma	myeloma	1
CHSA0011	1290767	Y	Y	Y	N	Y	bone	chondrosarcoma	3
CHSA0108	1290768	Y	Y	Y	N	Y	bone	chondrosarcoma	4
JIMT-1	1298157	Y	Y	Y	N	Y	breast	breast	5
CL-34	1290771	Y	Y	Y	N	Y	large_intestine	large_intestine	6
VMRC-LCD	713869	Y	Y	Y	N	Y	lung_NSCLC	lung_NSCLC_adenocarcinoma	2
K2	1298160	Y	Y	Y	N	Y	skin	melanoma	3
STS-0421	1299061	Y	Y	Y	N	Y	soft_tissue	soft_tissue_other	4
KP-2	1298218	Y	N	Y	N	Y	pancreas	pancreas	6

## Sheet: 200 drugs
Drug Name	Clustering
Doxorubicin	2
Etoposide	2
Gemcitabine	2
Mitomycin-C	2
Vinorelbine	2
NSC-87877	3
Bicalutamide	4
QS11	3
CP466722	5
Midostaurin	3
CHIR-99021	5
Ponatinib	3
AZD6482	3
JNK-9L	5
PF-562271	5
HG6-64-1	3
JQ1	3
DMOG	1
FTI-277	3
OSU-03012	3
Shikonin	2
AKT inhibitor VIII	3
Embelin	2
FH535	4
PAC-1	3
IPA-3	2
GSK650394	3
BAY-61-3606	3
5-Fluorouracil	1
Thapsigargin	1
Obatoclax Mesylate	3
BMS-754807	5
Linsitinib	3
Bexarotene	2
LFM-A13	4
GW-2580	3
Luminespib	3
Phenformin	2
Bryostatin 1	1
Pazopanib	5
Dacinostat	3
Epothilone B	2
GSK1904529A	5
BMS-345541	5
Tipifarnib	4
Avagacestat	5
Ruxolitinib	5
AS601245	5
Ispinesib Mesylate	3
AT-7519	5
TAK-715	3
BX-912	5
ZSTK474	5
AS605240	4
GSK1070916	3
AKT inhibitor VIII	3
Enzastaurin	3
GSK429286A	3
Idelalisib	5
UNC0638	5
Cabozantinib	3
WZ3105	3
Quizartinib	5
CP724714	3
JW-7-24-1	3
NPK76-II-72-1	5
STF-62247	5
NG-25	3
VX-11e	5
FR-180204	5
Tubastatin A	3
Zibotentan	5
Sepantronium bromide	5
NSC-207895	2
VNLG/124	2
AR-42	3
CUDC-101	3
Belinostat	3
I-BET-762	3
CAY10603	3
Linifanib	3
BIX02189	3
Alectinib	3
Pelitinib	3
Omipalisib	4
KIN001-244	3
WHI-P97	3
KIN001-260	3
KIN001-266	5
Masitinib	3
Amuvatinib	5
MPS-1-IN-1	5
NVP-BHG712	3
OSI-930	3
OSI-027	3
CX-5461	5
PHA-793887	3
PI-103	5
PIK-93	4
SB52334	5
TPCA-1	4
Fedratinib	5
WIKI4	3
Y-39983	3
YM201636	5
Tivozanib	5
GSK690693	5
SNX-2112	3
T0901317	4
Selisistat	2
KIN001-270	3
AICA Ribonucleotide	1
Vinblastine	2
Cisplatin	1
Cytarabine	1
Docetaxel	1
Methotrexate	5
Tretinoin	2
Gefitinib	5
Navitoclax	3
Vorinostat	3
Nilotinib	3
Refametinib	4
CI-1040	4
Temsirolimus	1
Olaparib	3
Veliparib	4
Bosutinib	5
Lenalidomide	3
Axitinib	3
AZD7762	4
GW441756	3
Lestauritinib	2
SB216763	4
Tanespimycin	2
VX-702	4
Motesanib	3
KU-55933	3
Elesclomol	3
Afatinib	5
Vismodegib	4
PLX-4720	4
BX796	5
NU7441	3
SL0101	2
Doramapimod	3
JNK Inhibitor VIII	3
Drug-681640	4
Nutlin-3a (-)	3
PD173074	5
ZM447439	3
RO-3306	3
MK-2206	3
Palbociclib	5
Dactolisib	3
Pictilisib	5
AZD8055	5
PD0325901	4
SB590885	3
Selumetinib	5
AZD6482	3
CCT007093	2
EHT-1864	3
Avagacestat	5
BMS-536924	5
Cetuximab	2
PF-4708671	5
Serdemetan	5
TW 37	2
XMD8-92	3
CCT-018159	3
Rucaparib	3
GSK269962A	5
SB-505124	3
Tamoxifen	3
JQ1	3
PFI-1	4
IOX2	3
UNC0638	5
YK-4-279	4
CHIR-99021	5
(5Z)-7-Oxozeaenol	2
Piperlongumine	3
Daporinad	3
Talazoparib	3
UNC1215	3
SGC0946	5
XAV939	4
PLX-4720	4
Trametinib	3
Dabrafenib	4
Temozolomide	1
Afatinib	5
SN-38	3
Olaparib	3
Selumetinib	5
Bicalutamide	4
Refametinib	4
Pictilisib	5
Pevonedistat	5

## Sheet: All cell lines
Sample Name	COSMIC identifier	Whole Exome Sequencing (WES)	Copy Number Alterations (CNA)	Gene Expression	Methylation	Drug Response	GDSC Tissue descriptor 1	GDSC Tissue descriptor 2
A253	906794	Y	Y	Y	Y	Y	aero_dig_tract	head and neck
BB30-HNC	753531	Y	Y	Y	Y	Y	aero_dig_tract	head and neck
BB49-HNC	753532	Y	Y	Y	Y	Y	aero_dig_tract	head and neck
BHY	753535	Y	Y	Y	Y	Y	aero_dig_tract	head and neck
BICR10	1290724	Y	Y	Y	Y	Y	aero_dig_tract	head and neck
BICR22	1240121	Y	Y	Y	Y	Y	aero_dig_tract	head and neck
BICR31	1290725	Y	Y	Y	Y	Y	aero_dig_tract	head and neck
BICR78	1240122	Y	Y	Y	Y	Y	aero_dig_tract	head and neck
Ca9-22	753538	Y	Y	Y	Y	Y	aero_dig_tract	head and neck
CAL-27	910916	Y	Y	Y	Y	Y	aero_dig_tract	head and neck
CAL-33	753541	Y	Y	Y	Y	Y	aero_dig_tract	head and neck
Detroit562	906837	Y	Y	Y	Y	Y	aero_dig_tract	head and neck
DOK	910936	Y	Y	Y	Y	Y	aero_dig_tract	head and neck
FADU	906863	Y	Y	Y	Y	Y	aero_dig_tract	head and neck
H3118	1240140	Y	Y	Y	Y	Y	aero_dig_tract	head and neck
HN	907059	Y	Y	Y	Y	Y	aero_dig_tract	head and neck
HO-1-N-1	924111	Y	Y	Y	Y	Y	aero_dig_tract	head and neck
HO-1-u-1	753561	Y	Y	Y	Y	Y	aero_dig_tract	head and neck
HSC-2	753562	Y	Y	Y	Y	Y	aero_dig_tract	head and neck
HSC-3	907061	Y	Y	Y	Y	Y	aero_dig_tract	head and neck
HSC-4	907062	Y	Y	Y	Y	Y	aero_dig_tract	head and neck
JHU-011	1240161	Y	Y	Y	Y	Y	aero_dig_tract	head and neck
JHU-022	1240162	Y	Y	Y	Y	Y	aero_dig_tract	head and neck
KON	1298215	Y	Y	Y	Y	Y	aero_dig_tract	head and neck
KOSC-2	753570	Y	Y	Y	Y	Y	aero_dig_tract	head and neck
LB771-HNC	753583	Y	Y	Y	Y	Y	aero_dig_tract	head and neck
OSC-19	1298362	Y	Y	Y	Y	Y	aero_dig_tract	head and neck
OSC-20	1240196	Y	Y	Y	Y	Y	aero_dig_tract	head and neck
PCI-15A	1240204	Y	Y	Y	Y	Y	aero_dig_tract	head and neck
PCI-30	1298529	Y	Y	Y	Y	Y	aero_dig_tract	head and neck
PCI-38	1240205	Y	Y	Y	Y	Y	aero_dig_tract	head and neck
PCI-4B	1298531	Y	Y	Y	Y	Y	aero_dig_tract	head and neck
PCI-6A	1240206	Y	Y	Y	Y	Y	aero_dig_tract	head and neck
PE/CA-PJ15	1240207	Y	Y	Y	Y	Y	aero_dig_tract	head and neck
RPMI-2650	909700	Y	Y	Y	Y	Y	aero_dig_tract	head and neck
SAS	909708	Y	Y	Y	Y	Y	aero_dig_tract	head and neck
SAT	1299050	Y	Y	Y	Y	Y	aero_dig_tract	head and neck
SCC-15	910911	Y	Y	Y	Y	Y	aero_dig_tract	head and neck
SCC-25	910701	Y	Y	Y	Y	Y	aero_dig_tract	head and neck
SCC-4	910904	Y	Y	Y	Y	Y	aero_dig_tract	head and neck
SCC-9	909709	Y	Y	Y	Y	Y	aero_dig_tract	head and neck
SKN-3	1299059	Y	Y	Y	Y	Y	aero_dig_tract	head and neck
COLO-680N	906817	Y	Y	Y	Y	Y	aero_dig_tract	oesophagus
EC-GI-10	753555	Y	Y	Y	Y	Y	aero_dig_tract	oesophagus
ESO26	1503366	Y	Y	Y	Y	Y	aero_dig_tract	oesophagus
ESO51	1503367	Y	Y	Y	Y	Y	aero_dig_tract	oesophagus
FLO-1	1503361	Y	Y	Y	Y	Y	aero_dig_tract	oesophagus
HCE-4	753559	Y	Y	Y	Y	Y	aero_dig_tract	oesophagus
KYAE-1	1503368	Y	Y	Y	Y	Y	aero_dig_tract	oesophagus
KYSE-140	753573	Y	Y	Y	Y	Y	aero_dig_tract	oesophagus
KYSE-150	907317	Y	Y	Y	Y	Y	aero_dig_tract	oesophagus
KYSE-180	907318	Y	Y	Y	Y	Y	aero_dig_tract	oesophagus
KYSE-220	1240167	Y	Y	Y	Y	Y	aero_dig_tract	oesophagus
KYSE-270	907319	Y	Y	Y	Y	Y	aero_dig_tract	oesophagus
KYSE-410	753574	Y	Y	Y	Y	Y	aero_dig_tract	oesophagus
KYSE-450	907320	Y	Y	Y	Y	Y	aero_dig_tract	oesophagus
KYSE-50	1298222	Y	Y	Y	Y	Y	aero_dig_tract	oesophagus
KYSE-510	907321	Y	Y	Y	Y	Y	aero_dig_tract	oesophagus
KYSE-520	753575	Y	Y	Y	Y	Y	aero_dig_tract	oesophagus
KYSE-70	753576	Y	Y	Y	Y	Y	aero_dig_tract	oesophagus
OACM5-1	1503363	Y	Y	Y	Y	Y	aero_dig_tract	oesophagus
OACp4C	1503362	Y	Y	Y	Y	Y	aero_dig_tract	oesophagus
OE19	910079	Y	Y	Y	Y	Y	aero_dig_tract	oesophagus
OE21	1298359	Y	Y	Y	Y	Y	aero_dig_tract	oesophagus
OE33	910549	Y	Y	Y	Y	Y	aero_dig_tract	oesophagus
SK-GT-4	1503365	Y	Y	Y	Y	Y	aero_dig_tract	oesophagus
TE-1	753621	Y	Y	Y	Y	Y	aero_dig_tract	oesophagus
TE-10	753622	Y	Y	Y	Y	Y	aero_dig_tract	oesophagus
TE-11	946354	Y	Y	Y	Y	Y	aero_dig_tract	oesophagus
TE-12	946356	Y	Y	Y	Y	Y	aero_dig_tract	oesophagus
TE-15	753614	Y	Y	Y	Y	Y	aero_dig_tract	oesophagus
TE-4	1503371	Y	Y	Y	Y	Y	aero_dig_tract	oesophagus
TE-5	735784	Y	Y	Y	Y	Y	aero_dig_tract	oesophagus
TE-6	946355	Y	Y	Y	Y	Y	aero_dig_tract	oesophagus
TE-8	753623	Y	Y	Y	Y	Y	aero_dig_tract	oesophagus
TE-9	946353	Y	Y	Y	Y	Y	aero_dig_tract	oesophagus
T-T	1299064	Y	Y	Y	Y	Y	aero_dig_tract	oesophagus
CESS	910688	Y	Y	Y	Y	Y	leukemia	acute_myeloid_leukaemia
CTV-1	753548	Y	Y	Y	Y	Y	leukemia	acute_myeloid_leukaemia
GDM-1	906870	Y	Y	Y	Y	Y	leukemia	acute_myeloid_leukaemia
HEL	907053	Y	Y	Y	Y	Y	leukemia	acute_myeloid_leukaemia
HL-60	905938	Y	Y	Y	Y	Y	leukemia	acute_myeloid_leukaemia
KASUMI-1	907275	Y	Y	Y	Y	Y	leukemia	acute_myeloid_leukaemia
KG-1	907278	Y	Y	Y	Y	Y	leukemia	acute_myeloid_leukaemia
KMOE-2	907280	Y	Y	Y	Y	Y	leukemia	acute_myeloid_leukaemia
ME-1	1330942	Y	Y	Y	Y	Y	leukemia	acute_myeloid_leukaemia
ML-2	908141	Y	Y	Y	Y	Y	leukemia	acute_myeloid_leukaemia
MOLM-13	1330947	Y	Y	Y	Y	Y	leukemia	acute_myeloid_leukaemia
MONO-MAC-6	908148	Y	Y	Y	Y	Y	leukemia	acute_myeloid_leukaemia
NKM-1	908448	Y	Y	Y	Y	Y	leukemia	acute_myeloid_leukaemia
NOMO-1	908451	Y	Y	Y	Y	Y	leukemia	acute_myeloid_leukaemia
OCI-AML2	910947	Y	Y	Y	Y	Y	leukemia	acute_myeloid_leukaemia
OCI-AML3	1290455	Y	Y	Y	Y	Y	leukemia	acute_myeloid_leukaemia
OCI-AML5	1330983	Y	Y	Y	Y	Y	leukemia	acute_myeloid_leukaemia
OCI-M1	1330985	Y	Y	Y	Y	Y	leukemia	acute_myeloid_leukaemia
P31-FUJ	909253	Y	Y	Y	Y	Y	leukemia	acute_myeloid_leukaemia
PL-21	1330991	Y	Y	Y	Y	Y	leukemia	acute_myeloid_leukaemia
QIMR-WIL	910545	Y	Y	Y	Y	Y	leukemia	acute_myeloid_leukaemia
SIG-M5	909715	Y	Y	Y	Y	Y	leukemia	acute_myeloid_leukaemia
THP-1	909771	Y	Y	Y	Y	Y	leukemia	acute_myeloid_leukaemia
KARPAS-299	907273	Y	Y	Y	Y	Y	lymphoma	anaplastic_large_cell_lymphoma
SU-DHL-1	909742	Y	Y	Y	Y	Y	lymphoma	anaplastic_large_cell_lymphoma
SUP-M2	1331040	Y	Y	Y	Y	Y	lymphoma	anaplastic_large_cell_lymphoma
BALL-1	910705	Y	Y	Y	Y	Y	leukemia	B_cell_leukemia
KARPAS-231	1327774	Y	Y	Y	Y	Y	leukemia	B_cell_leukemia
KOPN-8	1330933	Y	Y	Y	Y	Y	leukemia	B_cell_leukemia
MHH-CALL-2	908132	Y	Y	Y	Y	Y	leukemia	B_cell_leukemia
MHH-PREB-1	908136	Y	Y	Y	Y	Y	leukemia	B_cell_leukemia
MN-60	908143	Y	Y	Y	Y	Y	leukemia	B_cell_leukemia
NALM-6	908158	Y	Y	Y	Y	Y	leukemia	B_cell_leukemia
RCH-ACV	1330994	Y	Y	Y	Y	Y	leukemia	B_cell_leukemia
REH	909696	Y	Y	Y	Y	Y	leukemia	B_cell_leukemia
ROS-50	1331025	Y	Y	Y	Y	Y	leukemia	B_cell_leukemia
SUP-B8	910209	Y	Y	Y	Y	Y	leukemia	B_cell_leukemia
U-698-M	909777	Y	Y	Y	Y	Y	leukemia	B_cell_leukemia
A3-KAW	910935	Y	Y	Y	Y	Y	lymphoma	B_cell_lymphoma
A4-Fuk	910934	Y	Y	Y	Y	Y	lymphoma	B_cell_lymphoma
BC-1	910919	Y	Y	Y	Y	Y	lymphoma	B_cell_lymphoma
CRO-AP2	906807	Y	Y	Y	Y	Y	lymphoma	B_cell_lymphoma
CTB-1	949088	Y	Y	Y	Y	Y	lymphoma	B_cell_lymphoma
DB	906832	Y	Y	Y	Y	Y	lymphoma	B_cell_lymphoma
DOHH-2	906842	Y	Y	Y	Y	Y	lymphoma	B_cell_lymphoma
Farage	1297449	Y	Y	Y	Y	Y	lymphoma	B_cell_lymphoma
GRANTA-519	1303897	Y	Y	Y	Y	Y	lymphoma	B_cell_lymphoma
JEKO-1	1327765	Y	Y	Y	Y	Y	lymphoma	B_cell_lymphoma
JSC-1	1327769	Y	Y	Y	Y	Y	lymphoma	B_cell_lymphoma
KARPAS-1106P	1327773	Y	Y	Y	Y	Y	lymphoma	B_cell_lymphoma
KARPAS-422	907274	Y	Y	Y	Y	Y	lymphoma	B_cell_lymphoma
MC116	907799	Y	Y	Y	Y	Y	lymphoma	B_cell_lymphoma
NU-DUL-1	1330982	Y	Y	Y	Y	Y	lymphoma	B_cell_lymphoma
OCI-LY-19	1330984	Y	Y	Y	Y	Y	lymphoma	B_cell_lymphoma
RC-K8	1330995	Y	Y	Y	Y	Y	lymphoma	B_cell_lymphoma
RL	910861	Y	Y	Y	Y	Y	lymphoma	B_cell_lymphoma
SCC-3	910930	Y	Y	Y	Y	Y	lymphoma	B_cell_lymphoma
SLVL	1331032	Y	Y	Y	Y	Y	lymphoma	B_cell_lymphoma
SU-DHL-10	1331033	Y	Y	Y	Y	Y	lymphoma	B_cell_lymphoma
SU-DHL-16	1331034	Y	Y	Y	Y	Y	lymphoma	B_cell_lymphoma
SU-DHL-4	1331035	Y	Y	Y	Y	Y	lymphoma	B_cell_lymphoma
SU-DHL-5	1331036	Y	Y	Y	Y	Y	lymphoma	B_cell_lymphoma
SU-DHL-6	1331037	Y	Y	Y	Y	Y	lymphoma	B_cell_lymphoma
SU-DHL-8	1331038	Y	Y	Y	Y	Y	lymphoma	B_cell_lymphoma
TK	1331045	Y	Y	Y	Y	Y	lymphoma	B_cell_lymphoma
TUR	909773	Y	Y	Y	Y	Y	lymphoma	B_cell_lymphoma
VAL	1331048	Y	Y	Y	Y	Y	lymphoma	B_cell_lymphoma
WSU-DLCL2	1331050	Y	Y	Y	Y	Y	lymphoma	B_cell_lymphoma
BL-41	910706	Y	Y	Y	Y	Y	lymphoma	Burkitt_lymphoma
CA46	910703	Y	Y	Y	Y	Y	lymphoma	Burkitt_lymphoma
Daudi	906831	Y	Y	Y	Y	Y	lymphoma	Burkitt_lymphoma
DG-75	906838	Y	Y	Y	Y	Y	lymphoma	Burkitt_lymphoma
EB2	906846	Y	Y	Y	Y	Y	lymphoma	Burkitt_lymphoma
EB-3	906847	Y	Y	Y	Y	Y	lymphoma	Burkitt_lymphoma
GA-10	1303896	Y	Y	Y	Y	Y	lymphoma	Burkitt_lymphoma
JiyoyeP-2003	907268	Y	Y	Y	Y	Y	lymphoma	Burkitt_lymphoma
NAMALWA	908159	Y	Y	Y	Y	Y	lymphoma	Burkitt_lymphoma
P32-ISH	1330987	Y	Y	Y	Y	Y	lymphoma	Burkitt_lymphoma
Raji	909262	Y	Y	Y	Y	Y	lymphoma	Burkitt_lymphoma
Ramos-2G6-4C10	910401	Y	Y	Y	Y	Y	lymphoma	Burkitt_lymphoma
ST486	910906	Y	Y	Y	Y	Y	lymphoma	Burkitt_lymphoma
BV-173	910710	Y	Y	Y	Y	Y	leukemia	chronic_myeloid_leukaemia
CML-T1	910951	Y	Y	Y	Y	Y	leukemia	chronic_myeloid_leukaemia
EM-2	906855	Y	Y	Y	Y	Y	leukemia	chronic_myeloid_leukaemia
JURL-MK1	1327771	Y	Y	Y	Y	Y	leukemia	chronic_myeloid_leukaemia
K-562	905940	Y	Y	Y	Y	Y	leukemia	chronic_myeloid_leukaemia
KCL-22	1330931	Y	Y	Y	Y	Y	leukemia	chronic_myeloid_leukaemia
KU812	907311	Y	Y	Y	Y	Y	leukemia	chronic_myeloid_leukaemia
LAMA-84	907783	Y	Y	Y	Y	Y	leukemia	chronic_myeloid_leukaemia
MEG-01	908126	Y	Y	Y	Y	Y	leukemia	chronic_myeloid_leukaemia
RPMI-8866	910544	Y	Y	Y	Y	Y	leukemia	chronic_myeloid_leukaemia
AMO-1	1295741	Y	Y	Y	Y	Y	myeloma	haematopoietic_neoplasm other
EoL-1-cell	906856	Y	Y	Y	Y	Y	leukemia	haematopoietic_neoplasm other
JJN-3	1327766	Y	Y	Y	Y	Y	myeloma	haematopoietic_neoplasm other
KARPAS-620	1327775	Y	Y	Y	Y	Y	myeloma	haematopoietic_neoplasm other
MC-CAR	683665	Y	Y	Y	Y	Y	myeloma	haematopoietic_neoplasm other
SKM-1	909722	Y	Y	Y	Y	Y	leukemia	haematopoietic_neoplasm other
HC-1	907044	Y	Y	Y	Y	Y	leukemia	hairy_cell_leukaemia
MLMA	908142	Y	Y	Y	Y	Y	leukemia	hairy_cell_leukaemia
Mo-T	908149	Y	Y	Y	Y	Y	leukemia	hairy_cell_leukaemia
HDLM-2	924110	Y	Y	Y	Y	Y	lymphoma	Hodgkin_lymphoma
HD-MY-Z	907050	Y	Y	Y	Y	Y	lymphoma	Hodgkin_lymphoma
Hs-445	1322218	Y	Y	Y	Y	Y	lymphoma	Hodgkin_lymphoma
KM-H2	909976	Y	Y	Y	Y	Y	lymphoma	Hodgkin_lymphoma
L-1236	1330935	Y	Y	Y	Y	Y	lymphoma	Hodgkin_lymphoma
L-428	907322	Y	Y	Y	Y	Y	lymphoma	Hodgkin_lymphoma
L-540	907323	Y	Y	Y	Y	Y	lymphoma	Hodgkin_lymphoma
RPMI-6666	909701	Y	Y	Y	Y	Y	lymphoma	Hodgkin_lymphoma
SUP-HD1	1331039	Y	Y	Y	Y	Y	lymphoma	Hodgkin_lymphoma
KY821	907300	Y	Y	Y	Y	Y	leukemia	leukemia
MV-4-11	908156	Y	Y	Y	Y	Y	leukemia	leukemia
RS4-11	909703	Y	Y	Y	Y	Y	leukemia	leukemia
697	906800	Y	Y	Y	Y	Y	leukemia	lymphoblastic_leukemia
ALL-PO	910944	Y	Y	Y	Y	Y	leukemia	lymphoblastic_leukemia
BE-13	906763	Y	Y	Y	Y	Y	leukemia	lymphoblastic_leukemia
CCRF-CEM	905952	Y	Y	Y	Y	Y	leukemia	lymphoblastic_leukemia
GR-ST	906877	Y	Y	Y	Y	Y	leukemia	lymphoblastic_leukemia
HAL-01	949153	Y	Y	Y	Y	Y	leukemia	lymphoblastic_leukemia
KARPAS-45	907272	Y	Y	Y	Y	Y	leukemia	lymphoblastic_leukemia
KE-37	907277	Y	Y	Y	Y	Y	leukemia	lymphoblastic_leukemia
LC4-1	907787	Y	Y	Y	Y	Y	leukemia	lymphoblastic_leukemia
MOLT-4	905958	Y	Y	Y	Y	Y	leukemia	lymphoblastic_leukemia
P30-OHK	909252	Y	Y	Y	Y	Y	leukemia	lymphoblastic_leukemia
SUP-B15	1247871	Y	Y	Y	Y	Y	leukemia	lymphoblastic_leukemia
ATN-1	910687	Y	Y	Y	Y	Y	leukemia	lymphoblastic_T_cell_leukaemia
LOUCY	907789	Y	Y	Y	Y	Y	leukemia	lymphoblastic_T_cell_leukaemia
MOLT-13	908146	Y	Y	Y	Y	Y	leukemia	lymphoblastic_T_cell_leukaemia
MOLT-16	908147	Y	Y	Y	Y	Y	leukemia	lymphoblastic_T_cell_leukaemia
P12-ICHIKAWA	909251	Y	Y	Y	Y	Y	leukemia	lymphoblastic_T_cell_leukaemia
PF-382	909260	Y	Y	Y	Y	Y	leukemia	lymphoblastic_T_cell_leukaemia
RPMI-8402	909702	Y	Y	Y	Y	Y	leukemia	lymphoblastic_T_cell_leukaemia
SUP-T1	909743	Y	Y	Y	Y	Y	leukemia	lymphoblastic_T_cell_leukaemia
DEL	906836	Y	Y	Y	Y	Y	lymphoma	lymphoid_neoplasm other
EHEB	906854	Y	Y	Y	Y	Y	lymphoma	lymphoid_neoplasm other
EJM	1297447	Y	Y	Y	Y	Y	myeloma	lymphoid_neoplasm other
H9	907043	Y	Y	Y	Y	Y	lymphoma	lymphoid_neoplasm other
JVM-2	907269	Y	Y	Y	Y	Y	lymphoma	lymphoid_neoplasm other
JVM-3	907270	Y	Y	Y	Y	Y	lymphoma	lymphoid_neoplasm other
SR	905965	Y	Y	Y	Y	Y	lymphoma	lymphoid_neoplasm other
WIL2-NS	1331049	Y	Y	Y	Y	Y	lymphoma	lymphoid_neoplasm other
WSU-NHL	909785	Y	Y	Y	Y	Y	lymphoma	lymphoid_neoplasm other
YT	946358	Y	Y	Y	Y	Y	lymphoma	lymphoid_neoplasm other
ARH-77	906765	Y	Y	Y	Y	Y	myeloma	myeloma
IM-9	753563	Y	Y	Y	Y	Y	myeloma	myeloma
KMS-12-BM	907281	Y	Y	Y	Y	Y	myeloma	myeloma
L-363	924239	Y	Y	Y	Y	Y	myeloma	myeloma
LP-1	907791	Y	Y	Y	Y	Y	myeloma	myeloma
MM1S	1659818	Y	Y	Y	Y	Y	myeloma	myeloma
MOLP-8	1330950	Y	Y	Y	Y	Y	myeloma	myeloma
NCI-H929	724825	Y	Y	Y	Y	Y	myeloma	myeloma
OPM-2	909249	Y	Y	Y	Y	Y	myeloma	myeloma
RPMI-8226	905964	Y	Y	Y	Y	Y	myeloma	myeloma
SK-MM-2	753612	Y	Y	Y	Y	Y	myeloma	myeloma
U-266	753615	Y	Y	Y	Y	Y	myeloma	myeloma
ALL-SIL	1295740	Y	Y	Y	Y	Y	leukemia	T_cell_leukemia
DND-41	1297446	Y	Y	Y	Y	Y	leukemia	T_cell_leukemia
HH	907056	Y	Y	Y	Y	Y	leukemia	T_cell_leukemia
Jurkat	998184	Y	Y	Y	Y	Y	leukemia	T_cell_leukemia
CS1	1290795	Y	Y	Y	Y	Y	bone	bone_other
SJSA-1	909717	Y	Y	Y	Y	Y	bone	bone_other
CAL-78	1290765	Y	Y	Y	Y	Y	bone	chondrosarcoma
CHSA8926	1303912	Y	Y	Y	Y	Y	bone	chondrosarcoma
H-EMC-SS	907290	Y	Y	Y	Y	Y	bone	chondrosarcoma
CADO-ES1	753539	Y	Y	Y	Y	Y	bone	ewings_sarcoma
ES1	949158	Y	Y	Y	Y	Y	bone	ewings_sarcoma
ES3	684055	Y	Y	Y	Y	Y	bone	ewings_sarcoma
ES4	949156	Y	Y	Y	Y	Y	bone	ewings_sarcoma
ES5	684057	Y	Y	Y	Y	Y	bone	ewings_sarcoma
ES7	684059	Y	Y	Y	Y	Y	bone	ewings_sarcoma
ES8	949155	Y	Y	Y	Y	Y	bone	ewings_sarcoma
EW-1	949163	Y	Y	Y	Y	Y	bone	ewings_sarcoma
EW-11	684062	Y	Y	Y	Y	Y	bone	ewings_sarcoma
EW-12	949162	Y	Y	Y	Y	Y	bone	ewings_sarcoma
EW-13	949166	Y	Y	Y	Y	Y	bone	ewings_sarcoma
EW-16	949165	Y	Y	Y	Y	Y	bone	ewings_sarcoma
EW-18	949164	Y	Y	Y	Y	Y	bone	ewings_sarcoma
EW-22	949167	Y	Y	Y	Y	Y	bone	ewings_sarcoma
EW-24	949168	Y	Y	Y	Y	Y	bone	ewings_sarcoma
EW-3	949161	Y	Y	Y	Y	Y	bone	ewings_sarcoma
EW-7	949160	Y	Y	Y	Y	Y	bone	ewings_sarcoma
SK-ES-1	684072	Y	Y	Y	Y	Y	bone	ewings_sarcoma
SK-PN-DW	909731	Y	Y	Y	Y	Y	bone	ewings_sarcoma
TC-71	1240221	Y	Y	Y	Y	Y	bone	ewings_sarcoma
CAL-72	906827	Y	Y	Y	Y	Y	bone	osteosarcoma
G-292 Clone A141B1	1290807	Y	Y	Y	Y	Y	bone	osteosarcoma
HOS	907060	Y	Y	Y	Y	Y	bone	osteosarcoma
HuO-3N1	909977	Y	Y	Y	Y	Y	bone	osteosarcoma
HuO9	907072	Y	Y	Y	Y	Y	bone	osteosarcoma
MG-63	908131	Y	Y	Y	Y	Y	bone	osteosarcoma
NOS-1	925345	Y	Y	Y	Y	Y	bone	osteosarcoma
NY	910849	Y	Y	Y	Y	Y	bone	osteosarcoma
Saos-2	909707	Y	Y	Y	Y	Y	bone	osteosarcoma
U-2-OS	909776	Y	Y	Y	Y	Y	bone	osteosarcoma
AU565	910704	Y	Y	Y	Y	Y	breast	breast
BT-20	906801	Y	Y	Y	Y	Y	breast	breast
BT-474	946359	Y	Y	Y	Y	Y	breast	breast
BT-483	949093	Y	Y	Y	Y	Y	breast	breast
BT-549	905951	Y	Y	Y	Y	Y	breast	breast
CAL-120	906826	Y	Y	Y	Y	Y	breast	breast
CAL-148	924106	Y	Y	Y	Y	Y	breast	breast
CAL-51	910927	Y	Y	Y	Y	Y	breast	breast
CAL-85-1	910852	Y	Y	Y	Y	Y	breast	breast
CAMA-1	946382	Y	Y	Y	Y	Y	breast	breast
COLO-824	906812	Y	Y	Y	Y	Y	breast	breast
DU-4475	906844	Y	Y	Y	Y	Y	breast	breast
EFM-19	906851	Y	Y	Y	Y	Y	breast	breast
EFM-192A	1290798	Y	Y	Y	Y	Y	breast	breast
EVSA-T	906862	Y	Y	Y	Y	Y	breast	breast
HCC1143	749710	Y	Y	Y	Y	Y	breast	breast
HCC1187	749711	Y	Y	Y	Y	Y	breast	breast
HCC1395	749712	Y	Y	Y	Y	Y	breast	breast
HCC1419	907045	Y	Y	Y	Y	Y	breast	breast
HCC1428	1290905	Y	Y	Y	Y	Y	breast	breast
HCC1500	1303900	Y	Y	Y	Y	Y	breast	breast
HCC1569	907046	Y	Y	Y	Y	Y	breast	breast
HCC1599	749713	Y	Y	Y	Y	Y	breast	breast
HCC1806	907047	Y	Y	Y	Y	Y	breast	breast
HCC1937	749714	Y	Y	Y	Y	Y	breast	breast
HCC1954	749709	Y	Y	Y	Y	Y	breast	breast
HCC202	1290906	Y	Y	Y	Y	Y	breast	breast
HCC2157	749715	Y	Y	Y	Y	Y	breast	breast
HCC2218	749716	Y	Y	Y	Y	Y	breast	breast
HCC38	749717	Y	Y	Y	Y	Y	breast	breast
HCC70	907048	Y	Y	Y	Y	Y	breast	breast
HDQ-P1	1290922	Y	Y	Y	Y	Y	breast	breast
Hs-578-T	905957	Y	Y	Y	Y	Y	breast	breast
MCF7	905946	Y	Y	Y	Y	Y	breast	breast
MDA-MB-157	925338	Y	Y	Y	Y	Y	breast	breast
MDA-MB-231	905960	Y	Y	Y	Y	Y	breast	breast
MDA-MB-330	1330941	Y	Y	Y	Y	Y	breast	breast
MDA-MB-361	908121	Y	Y	Y	Y	Y	breast	breast
MDA-MB-415	924240	Y	Y	Y	Y	Y	breast	breast
MDA-MB-436	1240172	Y	Y	Y	Y	Y	breast	breast
MDA-MB-453	908122	Y	Y	Y	Y	Y	breast	breast
MDA-MB-468	908123	Y	Y	Y	Y	Y	breast	breast
MFM-223	910948	Y	Y	Y	Y	Y	breast	breast
MRK-nu-1	908151	Y	Y	Y	Y	Y	breast	breast
OCUB-M	909256	Y	Y	Y	Y	Y	breast	breast
T47D	905945	Y	Y	Y	Y	Y	breast	breast
UACC-812	910910	Y	Y	Y	Y	Y	breast	breast
UACC-893	909778	Y	Y	Y	Y	Y	breast	breast
ZR-75-30	909907	Y	Y	Y	Y	Y	breast	breast
EGI-1	906853	Y	Y	Y	Y	Y	digestive_system	biliary_tract
ETK-1	906861	Y	Y	Y	Y	Y	digestive_system	biliary_tract
HuCCT1	907069	Y	Y	Y	Y	Y	digestive_system	biliary_tract
TGBC1TKB	909769	Y	Y	Y	Y	Y	digestive_system	biliary_tract
TGBC24TKB	910695	Y	Y	Y	Y	Y	digestive_system	biliary_tract
HUTU-80	907073	Y	Y	Y	Y	Y	digestive_system	digestive_system_other
C2BBe1	910700	Y	Y	Y	Y	Y	large_intestine	large_intestine
CaR-1	924108	Y	Y	Y	Y	Y	large_intestine	large_intestine
CCK-81	1240123	Y	Y	Y	Y	Y	large_intestine	large_intestine
CL-11	1290769	Y	Y	Y	Y	Y	large_intestine	large_intestine
CL-40	1240124	Y	Y	Y	Y	Y	large_intestine	large_intestine
COLO-205	905961	Y	Y	Y	Y	Y	large_intestine	large_intestine
COLO-320-HSR	910569	Y	Y	Y	Y	Y	large_intestine	large_intestine
COLO-678	910689	Y	Y	Y	Y	Y	large_intestine	large_intestine
CW-2	910554	Y	Y	Y	Y	Y	large_intestine	large_intestine
GP5d	907291	Y	Y	Y	Y	Y	large_intestine	large_intestine
HCC2998	905971	Y	Y	Y	Y	Y	large_intestine	large_intestine
HCC-56	1290907	Y	Y	Y	Y	Y	large_intestine	large_intestine
HCT-116	905936	Y	Y	Y	Y	Y	large_intestine	large_intestine
HCT-15	905937	Y	Y	Y	Y	Y	large_intestine	large_intestine
HT-115	907289	Y	Y	Y	Y	Y	large_intestine	large_intestine
HT-29	905939	Y	Y	Y	Y	Y	large_intestine	large_intestine
HT55	907287	Y	Y	Y	Y	Y	large_intestine	large_intestine
KM12	905989	Y	Y	Y	Y	Y	large_intestine	large_intestine
LoVo	907790	Y	Y	Y	Y	Y	large_intestine	large_intestine
LS-1034	917486	Y	Y	Y	Y	Y	large_intestine	large_intestine
LS-123	907792	Y	Y	Y	Y	Y	large_intestine	large_intestine
LS-180	998189	Y	Y	Y	Y	Y	large_intestine	large_intestine
LS-411N	907794	Y	Y	Y	Y	Y	large_intestine	large_intestine
LS-513	907795	Y	Y	Y	Y	Y	large_intestine	large_intestine
MDST8	1240173	Y	Y	Y	Y	Y	large_intestine	large_intestine
NCI-H630	908482	Y	Y	Y	Y	Y	large_intestine	large_intestine
NCI-H716	908458	Y	Y	Y	Y	Y	large_intestine	large_intestine
NCI-H747	908457	Y	Y	Y	Y	Y	large_intestine	large_intestine
RCM-1	909263	Y	Y	Y	Y	Y	large_intestine	large_intestine
RKO	909698	Y	Y	Y	Y	Y	large_intestine	large_intestine
SK-CO-1	909718	Y	Y	Y	Y	Y	large_intestine	large_intestine
SNU-1040	1659823	Y	Y	Y	Y	Y	large_intestine	large_intestine
SNU-175	1659928	Y	Y	Y	Y	Y	large_intestine	large_intestine
SNU-407	1660034	Y	Y	Y	Y	Y	large_intestine	large_intestine
SNU-61	1660035	Y	Y	Y	Y	Y	large_intestine	large_intestine
SNU-81	1660036	Y	Y	Y	Y	Y	large_intestine	large_intestine
SNU-C1	910905	Y	Y	Y	Y	Y	large_intestine	large_intestine
SNU-C2B	909740	Y	Y	Y	Y	Y	large_intestine	large_intestine
SNU-C5	1674021	Y	Y	Y	Y	Y	large_intestine	large_intestine
SW1116	909746	Y	Y	Y	Y	Y	large_intestine	large_intestine
SW1417	909747	Y	Y	Y	Y	Y	large_intestine	large_intestine
SW1463	909748	Y	Y	Y	Y	Y	large_intestine	large_intestine
SW48	909751	Y	Y	Y	Y	Y	large_intestine	large_intestine
SW837	909755	Y	Y	Y	Y	Y	large_intestine	large_intestine
SW948	909757	Y	Y	Y	Y	Y	large_intestine	large_intestine
T84	909761	Y	Y	Y	Y	Y	large_intestine	large_intestine
C3A	910850	Y	Y	Y	Y	Y	digestive_system	liver
Hep 3B2_1-7	1240147	Y	Y	Y	Y	Y	digestive_system	liver
HLE	907057	Y	Y	Y	Y	Y	digestive_system	liver
huH-1	1298146	Y	Y	Y	Y	Y	digestive_system	liver
HuH-7	907071	Y	Y	Y	Y	Y	digestive_system	liver
JHH-1	1298151	Y	Y	Y	Y	Y	digestive_system	liver
JHH-6	1240159	Y	Y	Y	Y	Y	digestive_system	liver
JHH-7	1240160	Y	Y	Y	Y	Y	digestive_system	liver
SK-HEP-1	909719	Y	Y	Y	Y	Y	digestive_system	liver
SNU-182	1240216	Y	Y	Y	Y	Y	digestive_system	liver
SNU-387	909736	Y	Y	Y	Y	Y	digestive_system	liver
SNU-398	1240217	Y	Y	Y	Y	Y	digestive_system	liver
SNU-423	909737	Y	Y	Y	Y	Y	digestive_system	liver
SNU-449	909738	Y	Y	Y	Y	Y	digestive_system	liver
SNU-475	909739	Y	Y	Y	Y	Y	digestive_system	liver
23132-87	910924	Y	Y	Y	Y	Y	digestive_system	stomach
AGS	906790	Y	Y	Y	Y	Y	digestive_system	stomach
ECC10	906848	Y	Y	Y	Y	Y	digestive_system	stomach
ECC12	906849	Y	Y	Y	Y	Y	digestive_system	stomach
FU97	1290806	Y	Y	Y	Y	Y	digestive_system	stomach
GCIY	906869	Y	Y	Y	Y	Y	digestive_system	stomach
GT3TKB	907041	Y	Y	Y	Y	Y	digestive_system	stomach
HGC-27	907055	Y	Y	Y	Y	Y	digestive_system	stomach
Hs746T	1240151	Y	Y	Y	Y	Y	digestive_system	stomach
HSC-39	1322224	Y	Y	Y	Y	Y	digestive_system	stomach
IM-95	1240155	Y	Y	Y	Y	Y	digestive_system	stomach
KATOIII	907276	Y	Y	Y	Y	Y	digestive_system	stomach
MKN1	908138	Y	Y	Y	Y	Y	digestive_system	stomach
MKN28	908139	Y	Y	Y	Y	Y	digestive_system	stomach
MKN45	925340	Y	Y	Y	Y	Y	digestive_system	stomach
MKN7	924250	Y	Y	Y	Y	Y	digestive_system	stomach
NCI-N87	908461	Y	Y	Y	Y	Y	digestive_system	stomach
NCI-SNU-1	908444	Y	Y	Y	Y	Y	digestive_system	stomach
NCI-SNU-16	908446	Y	Y	Y	Y	Y	digestive_system	stomach
NCI-SNU-5	908445	Y	Y	Y	Y	Y	digestive_system	stomach
NUGC-3	908455	Y	Y	Y	Y	Y	digestive_system	stomach
NUGC-4	1298357	Y	Y	Y	Y	Y	digestive_system	stomach
OCUM-1	1298358	Y	Y	Y	Y	Y	digestive_system	stomach
RERF-GC-1B	1240209	Y	Y	Y	Y	Y	digestive_system	stomach
RF-48	909697	Y	Y	Y	Y	Y	digestive_system	stomach
SCH	909711	Y	Y	Y	Y	Y	digestive_system	stomach
SK-GT-2	1503364	Y	Y	Y	Y	Y	digestive_system	stomach
TGBC11TKB	909770	Y	Y	Y	Y	Y	digestive_system	stomach
SW13	909744	Y	Y	Y	Y	Y	kidney	adrenal_gland
769-P	910922	Y	Y	Y	Y	Y	kidney	kidney
786-0	905947	Y	Y	Y	Y	Y	kidney	kidney
A498	905948	Y	Y	Y	Y	Y	kidney	kidney
A704	910920	Y	Y	Y	Y	Y	kidney	kidney
ACHN	905950	Y	Y	Y	Y	Y	kidney	kidney
BB65-RCC	753533	Y	Y	Y	Y	Y	kidney	kidney
BFTC-909	910698	Y	Y	Y	Y	Y	kidney	kidney
CAKI-1	905963	Y	Y	Y	Y	Y	kidney	kidney
CAL-54	910952	Y	Y	Y	Y	Y	kidney	kidney
G-401	907299	Y	Y	Y	Y	Y	kidney	kidney
HA7-RCC	753558	Y	Y	Y	Y	Y	kidney	kidney
KMRC-1	1298168	Y	Y	Y	Y	Y	kidney	kidney
KMRC-20	1298169	Y	Y	Y	Y	Y	kidney	kidney
LB1047-RCC	753577	Y	Y	Y	Y	Y	kidney	kidney
LB2241-RCC	753578	Y	Y	Y	Y	Y	kidney	kidney
LB996-RCC	753585	Y	Y	Y	Y	Y	kidney	kidney
NCC010	1509073	Y	Y	Y	Y	Y	kidney	kidney
NCC021	1509074	Y	Y	Y	Y	Y	kidney	kidney
OS-RC-2	909250	Y	Y	Y	Y	Y	kidney	kidney
RCC10RGB	909974	Y	Y	Y	Y	Y	kidney	kidney
RCC-AB	1524418	Y	Y	Y	Y	Y	kidney	kidney
RCC-ER	1524417	Y	Y	Y	Y	Y	kidney	kidney
RCC-FG2	1524414	Y	Y	Y	Y	Y	kidney	kidney
RCC-JW	1524416	Y	Y	Y	Y	Y	kidney	kidney
RCC-MF	1524419	Y	Y	Y	Y	Y	kidney	kidney
RXF393	905978	Y	Y	Y	Y	Y	kidney	kidney
SN12C	905979	Y	Y	Y	Y	Y	kidney	kidney
TK10	905980	Y	Y	Y	Y	Y	kidney	kidney
U031	905981	Y	Y	Y	Y	Y	kidney	kidney
VMRC-RCZ	909781	Y	Y	Y	Y	Y	kidney	kidney
201T	1287381	Y	Y	Y	Y	Y	lung_NSCLC	lung_NSCLC_adenocarcinoma
A549	905949	Y	Y	Y	Y	Y	lung_NSCLC	lung_NSCLC_adenocarcinoma
ABC-1	906791	Y	Y	Y	Y	Y	lung_NSCLC	lung_NSCLC_adenocarcinoma
Calu-3	687777	Y	Y	Y	Y	Y	lung_NSCLC	lung_NSCLC_adenocarcinoma
Calu-6	724859	Y	Y	Y	Y	Y	lung_NSCLC	lung_NSCLC_adenocarcinoma
COR-L105	906805	Y	Y	Y	Y	Y	lung_NSCLC	lung_NSCLC_adenocarcinoma
EKVX	905970	Y	Y	Y	Y	Y	lung_NSCLC	lung_NSCLC_adenocarcinoma
EMC-BAC-1	1503369	Y	Y	Y	Y	Y	lung_NSCLC	lung_NSCLC_adenocarcinoma
EMC-BAC-2	1503370	Y	Y	Y	Y	Y	lung_NSCLC	lung_NSCLC_adenocarcinoma
H3255	1247873	Y	Y	Y	Y	Y	lung_NSCLC	lung_NSCLC_adenocarcinoma
HCC-44	1240145	Y	Y	Y	Y	Y	lung_NSCLC	lung_NSCLC_adenocarcinoma
HCC-78	1290908	Y	Y	Y	Y	Y	lung_NSCLC	lung_NSCLC_adenocarcinoma
HCC-827	1240146	Y	Y	Y	Y	Y	lung_NSCLC	lung_NSCLC_adenocarcinoma
LC-2-ad	907786	Y	Y	Y	Y	Y	lung_NSCLC	lung_NSCLC_adenocarcinoma
LXF-289	753592	Y	Y	Y	Y	Y	lung_NSCLC	lung_NSCLC_adenocarcinoma
NCI-H1355	724866	Y	Y	Y	Y	Y	lung_NSCLC	lung_NSCLC_adenocarcinoma
NCI-H1395	684681	Y	Y	Y	Y	Y	lung_NSCLC	lung_NSCLC_adenocarcinoma
NCI-H1435	1298347	Y	Y	Y	Y	Y	lung_NSCLC	lung_NSCLC_adenocarcinoma
NCI-H1563	753600	Y	Y	Y	Y	Y	lung_NSCLC	lung_NSCLC_adenocarcinoma
NCI-H1568	1298348	Y	Y	Y	Y	Y	lung_NSCLC	lung_NSCLC_adenocarcinoma
NCI-H1573	908472	Y	Y	Y	Y	Y	lung_NSCLC	lung_NSCLC_adenocarcinoma
NCI-H1623	687798	Y	Y	Y	Y	Y	lung_NSCLC	lung_NSCLC_adenocarcinoma
NCI-H1648	687799	Y	Y	Y	Y	Y	lung_NSCLC	lung_NSCLC_adenocarcinoma
NCI-H1650	687800	Y	Y	Y	Y	Y	lung_NSCLC	lung_NSCLC_adenocarcinoma
NCI-H1651	910900	Y	Y	Y	Y	Y	lung_NSCLC	lung_NSCLC_adenocarcinoma
NCI-H1666	908473	Y	Y	Y	Y	Y	lung_NSCLC	lung_NSCLC_adenocarcinoma
NCI-H1693	687802	Y	Y	Y	Y	Y	lung_NSCLC	lung_NSCLC_adenocarcinoma
NCI-H1703	908474	Y	Y	Y	Y	Y	lung_NSCLC	lung_NSCLC_adenocarcinoma
NCI-H1734	722058	Y	Y	Y	Y	Y	lung_NSCLC	lung_NSCLC_adenocarcinoma
NCI-H1755	908475	Y	Y	Y	Y	Y	lung_NSCLC	lung_NSCLC_adenocarcinoma
NCI-H1781	1298350	Y	Y	Y	Y	Y	lung_NSCLC	lung_NSCLC_adenocarcinoma
NCI-H1792	724868	Y	Y	Y	Y	Y	lung_NSCLC	lung_NSCLC_adenocarcinoma
NCI-H1793	908463	Y	Y	Y	Y	Y	lung_NSCLC	lung_NSCLC_adenocarcinoma
NCI-H1838	687807	Y	Y	Y	Y	Y	lung_NSCLC	lung_NSCLC_adenocarcinoma
NCI-H1944	1240185	Y	Y	Y	Y	Y	lung_NSCLC	lung_NSCLC_adenocarcinoma
NCI-H1975	924244	Y	Y	Y	Y	Y	lung_NSCLC	lung_NSCLC_adenocarcinoma
NCI-H1993	908476	Y	Y	Y	Y	Y	lung_NSCLC	lung_NSCLC_adenocarcinoma
NCI-H2009	724873	Y	Y	Y	Y	Y	lung_NSCLC	lung_NSCLC_adenocarcinoma
NCI-H2023	1240187	Y	Y	Y	Y	Y	lung_NSCLC	lung_NSCLC_adenocarcinoma
NCI-H2030	722045	Y	Y	Y	Y	Y	lung_NSCLC	lung_NSCLC_adenocarcinoma
NCI-H2085	687812	Y	Y	Y	Y	Y	lung_NSCLC	lung_NSCLC_adenocarcinoma
NCI-H2087	724834	Y	Y	Y	Y	Y	lung_NSCLC	lung_NSCLC_adenocarcinoma
NCI-H2122	722046	Y	Y	Y	Y	Y	lung_NSCLC	lung_NSCLC_adenocarcinoma
NCI-H2228	687816	Y	Y	Y	Y	Y	lung_NSCLC	lung_NSCLC_adenocarcinoma
NCI-H2291	724874	Y	Y	Y	Y	Y	lung_NSCLC	lung_NSCLC_adenocarcinoma
NCI-H23	905942	Y	Y	Y	Y	Y	lung_NSCLC	lung_NSCLC_adenocarcinoma
NCI-H2342	687819	Y	Y	Y	Y	Y	lung_NSCLC	lung_NSCLC_adenocarcinoma
NCI-H2347	687820	Y	Y	Y	Y	Y	lung_NSCLC	lung_NSCLC_adenocarcinoma
NCI-H2405	687821	Y	Y	Y	Y	Y	lung_NSCLC	lung_NSCLC_adenocarcinoma
NCI-H292	753604	Y	Y	Y	Y	Y	lung_NSCLC	lung_NSCLC_adenocarcinoma
NCI-H3122	1240190	Y	Y	Y	Y	Y	lung_NSCLC	lung_NSCLC_adenocarcinoma
NCI-H322M	905967	Y	Y	Y	Y	Y	lung_NSCLC	lung_NSCLC_adenocarcinoma
NCI-H358	908465	Y	Y	Y	Y	Y	lung_NSCLC	lung_NSCLC_adenocarcinoma
NCI-H441	908460	Y	Y	Y	Y	Y	lung_NSCLC	lung_NSCLC_adenocarcinoma
NCI-H522	905944	Y	Y	Y	Y	Y	lung_NSCLC	lung_NSCLC_adenocarcinoma
NCI-H596	908459	Y	Y	Y	Y	Y	lung_NSCLC	lung_NSCLC_adenocarcinoma
NCI-H650	722066	Y	Y	Y	Y	Y	lung_NSCLC	lung_NSCLC_adenocarcinoma
NCI-H838	910399	Y	Y	Y	Y	Y	lung_NSCLC	lung_NSCLC_adenocarcinoma
PC-14	753608	Y	Y	Y	Y	Y	lung_NSCLC	lung_NSCLC_adenocarcinoma
RERF-LC-KJ	1298537	Y	Y	Y	Y	Y	lung_NSCLC	lung_NSCLC_adenocarcinoma
RERF-LC-MS	910931	Y	Y	Y	Y	Y	lung_NSCLC	lung_NSCLC_adenocarcinoma
SK-LU-1	909721	Y	Y	Y	Y	Y	lung_NSCLC	lung_NSCLC_adenocarcinoma
SW1573	724878	Y	Y	Y	Y	Y	lung_NSCLC	lung_NSCLC_adenocarcinoma
NCI-H720	687600	Y	Y	Y	Y	Y	lung_NSCLC	lung_NSCLC_carcinoid
NCI-H727	724855	Y	Y	Y	Y	Y	lung_NSCLC	lung_NSCLC_carcinoid
NCI-H835	753607	Y	Y	Y	Y	Y	lung_NSCLC	lung_NSCLC_carcinoid
UMC-11	909779	Y	Y	Y	Y	Y	lung_NSCLC	lung_NSCLC_carcinoid
COR-L23	687780	Y	Y	Y	Y	Y	lung_NSCLC	lung_NSCLC_large cell
HOP-92	905973	Y	Y	Y	Y	Y	lung_NSCLC	lung_NSCLC_large cell
IA-LM	910779	Y	Y	Y	Y	Y	lung_NSCLC	lung_NSCLC_large cell
LCLC-103H	753586	Y	Y	Y	Y	Y	lung_NSCLC	lung_NSCLC_large cell
LCLC-97TM1	946361	Y	Y	Y	Y	Y	lung_NSCLC	lung_NSCLC_large cell
LU-65	724863	Y	Y	Y	Y	Y	lung_NSCLC	lung_NSCLC_large cell
LU-99A	907796	Y	Y	Y	Y	Y	lung_NSCLC	lung_NSCLC_large cell
NCI-H1155	908467	Y	Y	Y	Y	Y	lung_NSCLC	lung_NSCLC_large cell
NCI-H1299	724831	Y	Y	Y	Y	Y	lung_NSCLC	lung_NSCLC_large cell
NCI-H1581	908471	Y	Y	Y	Y	Y	lung_NSCLC	lung_NSCLC_large cell
NCI-H1915	1240184	Y	Y	Y	Y	Y	lung_NSCLC	lung_NSCLC_large cell
NCI-H661	687829	Y	Y	Y	Y	Y	lung_NSCLC	lung_NSCLC_large cell
NCI-H810	925341	Y	Y	Y	Y	Y	lung_NSCLC	lung_NSCLC_large cell
A427	910851	Y	Y	Y	Y	Y	lung_NSCLC	lung_NSCLC_not specified
BEN	753534	Y	Y	Y	Y	Y	lung_NSCLC	lung_NSCLC_not specified
CAL-12T	753540	Y	Y	Y	Y	Y	lung_NSCLC	lung_NSCLC_not specified
ChaGo-K-1	687596	Y	Y	Y	Y	Y	lung_NSCLC	lung_NSCLC_not specified
HCC-366	1240144	Y	Y	Y	Y	Y	lung_NSCLC	lung_NSCLC_not specified
NCI-H1770	687804	Y	Y	Y	Y	Y	lung_NSCLC	lung_NSCLC_not specified
NCI-H2110	1298351	Y	Y	Y	Y	Y	lung_NSCLC	lung_NSCLC_not specified
NCI-H2135	1298352	Y	Y	Y	Y	Y	lung_NSCLC	lung_NSCLC_not specified
NCI-H2172	1298353	Y	Y	Y	Y	Y	lung_NSCLC	lung_NSCLC_not specified
NCI-H2444	1298356	Y	Y	Y	Y	Y	lung_NSCLC	lung_NSCLC_not specified
NCI-H647	1240191	Y	Y	Y	Y	Y	lung_NSCLC	lung_NSCLC_not specified
EBC-1	753554	Y	Y	Y	Y	Y	lung_NSCLC	lung_NSCLC_squamous_cell_carcinoma
EPLC-272H	753556	Y	Y	Y	Y	Y	lung_NSCLC	lung_NSCLC_squamous_cell_carcinoma
HARA	1240142	Y	Y	Y	Y	Y	lung_NSCLC	lung_NSCLC_squamous_cell_carcinoma
HCC-15	1240143	Y	Y	Y	Y	Y	lung_NSCLC	lung_NSCLC_squamous_cell_carcinoma
KNS-62	753569	Y	Y	Y	Y	Y	lung_NSCLC	lung_NSCLC_squamous_cell_carcinoma
LC-1-sq	1298223	Y	Y	Y	Y	Y	lung_NSCLC	lung_NSCLC_squamous_cell_carcinoma
LK-2	687787	Y	Y	Y	Y	Y	lung_NSCLC	lung_NSCLC_squamous_cell_carcinoma
LOU-NH91	1298226	Y	Y	Y	Y	Y	lung_NSCLC	lung_NSCLC_squamous_cell_carcinoma
NCI-H1869	1240183	Y	Y	Y	Y	Y	lung_NSCLC	lung_NSCLC_squamous_cell_carcinoma
NCI-H2170	687815	Y	Y	Y	Y	Y	lung_NSCLC	lung_NSCLC_squamous_cell_carcinoma
NCI-H226	905941	Y	Y	Y	Y	Y	lung_NSCLC	lung_NSCLC_squamous_cell_carcinoma
NCI-H520	908443	Y	Y	Y	Y	Y	lung_NSCLC	lung_NSCLC_squamous_cell_carcinoma
RERF-LC-Sq1	1298538	Y	Y	Y	Y	Y	lung_NSCLC	lung_NSCLC_squamous_cell_carcinoma
SK-MES-1	909728	Y	Y	Y	Y	Y	lung_NSCLC	lung_NSCLC_squamous_cell_carcinoma
SW900	724879	Y	Y	Y	Y	Y	lung_NSCLC	lung_NSCLC_squamous_cell_carcinoma
COR-L321	1322213	Y	Y	Y	Y	Y	lung	Lung_other
COLO-668	910692	Y	Y	Y	Y	Y	lung_SCLC	lung_small_cell_carcinoma
COR-L279	910937	Y	Y	Y	Y	Y	lung_SCLC	lung_small_cell_carcinoma
COR-L303	1297438	Y	Y	Y	Y	Y	lung_SCLC	lung_small_cell_carcinoma
COR-L311	687980	Y	Y	Y	Y	Y	lung_SCLC	lung_small_cell_carcinoma
COR-L32	1322212	Y	Y	Y	Y	Y	lung_SCLC	lung_small_cell_carcinoma
COR-L88	906808	Y	Y	Y	Y	Y	lung_SCLC	lung_small_cell_carcinoma
CPC-N	753547	Y	Y	Y	Y	Y	lung_SCLC	lung_small_cell_carcinoma
DMS-114	687983	Y	Y	Y	Y	Y	lung_SCLC	lung_small_cell_carcinoma
DMS-273	687985	Y	Y	Y	Y	Y	lung_SCLC	lung_small_cell_carcinoma
DMS-53	907295	Y	Y	Y	Y	Y	lung_SCLC	lung_small_cell_carcinoma
IST-SL1	753564	Y	Y	Y	Y	Y	lung_SCLC	lung_small_cell_carcinoma
IST-SL2	753565	Y	Y	Y	Y	Y	lung_SCLC	lung_small_cell_carcinoma
LB647-SCLC	753582	Y	Y	Y	Y	Y	lung_SCLC	lung_small_cell_carcinoma
LU-134-A	753588	Y	Y	Y	Y	Y	lung_SCLC	lung_small_cell_carcinoma
LU-135	713899	Y	Y	Y	Y	Y	lung_SCLC	lung_small_cell_carcinoma
LU-139	713878	Y	Y	Y	Y	Y	lung_SCLC	lung_small_cell_carcinoma
LU-165	753589	Y	Y	Y	Y	Y	lung_SCLC	lung_small_cell_carcinoma
MS-1	753594	Y	Y	Y	Y	Y	lung_SCLC	lung_small_cell_carcinoma
NCI-H1048	687995	Y	Y	Y	Y	Y	lung_SCLC	lung_small_cell_carcinoma
NCI-H1092	687997	Y	Y	Y	Y	Y	lung_SCLC	lung_small_cell_carcinoma
NCI-H1105	908468	Y	Y	Y	Y	Y	lung_SCLC	lung_small_cell_carcinoma
NCI-H1341	1330964	Y	Y	Y	Y	Y	lung_SCLC	lung_small_cell_carcinoma
NCI-H1417	688001	Y	Y	Y	Y	Y	lung_SCLC	lung_small_cell_carcinoma
NCI-H1436	908469	Y	Y	Y	Y	Y	lung_SCLC	lung_small_cell_carcinoma
NCI-H146	910899	Y	Y	Y	Y	Y	lung_SCLC	lung_small_cell_carcinoma
NCI-H1688	1298349	Y	Y	Y	Y	Y	lung_SCLC	lung_small_cell_carcinoma
NCI-H1694	688006	Y	Y	Y	Y	Y	lung_SCLC	lung_small_cell_carcinoma
NCI-H1836	1240182	Y	Y	Y	Y	Y	lung_SCLC	lung_small_cell_carcinoma
NCI-H187	688007	Y	Y	Y	Y	Y	lung_SCLC	lung_small_cell_carcinoma
NCI-H1876	1330972	Y	Y	Y	Y	Y	lung_SCLC	lung_small_cell_carcinoma
NCI-H196	1240186	Y	Y	Y	Y	Y	lung_SCLC	lung_small_cell_carcinoma
NCI-H1963	688010	Y	Y	Y	Y	Y	lung_SCLC	lung_small_cell_carcinoma
NCI-H2029	688011	Y	Y	Y	Y	Y	lung_SCLC	lung_small_cell_carcinoma
NCI-H2066	1330973	Y	Y	Y	Y	Y	lung_SCLC	lung_small_cell_carcinoma
NCI-H209	688013	Y	Y	Y	Y	Y	lung_SCLC	lung_small_cell_carcinoma
NCI-H211	1240189	Y	Y	Y	Y	Y	lung_SCLC	lung_small_cell_carcinoma
NCI-H2141	688014	Y	Y	Y	Y	Y	lung_SCLC	lung_small_cell_carcinoma
NCI-H2196	908481	Y	Y	Y	Y	Y	lung_SCLC	lung_small_cell_carcinoma
NCI-H2227	688018	Y	Y	Y	Y	Y	lung_SCLC	lung_small_cell_carcinoma
NCI-H250	924241	Y	Y	Y	Y	Y	lung_SCLC	lung_small_cell_carcinoma
NCI-H345	688021	Y	Y	Y	Y	Y	lung_SCLC	lung_small_cell_carcinoma
NCI-H378	688022	Y	Y	Y	Y	Y	lung_SCLC	lung_small_cell_carcinoma
NCI-H446	688023	Y	Y	Y	Y	Y	lung_SCLC	lung_small_cell_carcinoma
NCI-H510A	753605	Y	Y	Y	Y	Y	lung_SCLC	lung_small_cell_carcinoma
NCI-H524	908483	Y	Y	Y	Y	Y	lung_SCLC	lung_small_cell_carcinoma
NCI-H526	688025	Y	Y	Y	Y	Y	lung_SCLC	lung_small_cell_carcinoma
NCI-H64	688026	Y	Y	Y	Y	Y	lung_SCLC	lung_small_cell_carcinoma
NCI-H69	688027	Y	Y	Y	Y	Y	lung_SCLC	lung_small_cell_carcinoma
NCI-H748	909194	Y	Y	Y	Y	Y	lung_SCLC	lung_small_cell_carcinoma
NCI-H82	688031	Y	Y	Y	Y	Y	lung_SCLC	lung_small_cell_carcinoma
NCI-H841	1240192	Y	Y	Y	Y	Y	lung_SCLC	lung_small_cell_carcinoma
NCI-H847	1240193	Y	Y	Y	Y	Y	lung_SCLC	lung_small_cell_carcinoma
SBC-1	713885	Y	Y	Y	Y	Y	lung_SCLC	lung_small_cell_carcinoma
SBC-3	753610	Y	Y	Y	Y	Y	lung_SCLC	lung_small_cell_carcinoma
SBC-5	713880	Y	Y	Y	Y	Y	lung_SCLC	lung_small_cell_carcinoma
H2369	1290808	Y	Y	Y	Y	Y	lung	mesothelioma
H2373	1290809	Y	Y	Y	Y	Y	lung	mesothelioma
H2461	1290810	Y	Y	Y	Y	Y	lung	mesothelioma
H2591	1240131	Y	Y	Y	Y	Y	lung	mesothelioma
H2595	1240132	Y	Y	Y	Y	Y	lung	mesothelioma
H2722	1290812	Y	Y	Y	Y	Y	lung	mesothelioma
H2731	1240134	Y	Y	Y	Y	Y	lung	mesothelioma
H2795	1290813	Y	Y	Y	Y	Y	lung	mesothelioma
H2803	1240135	Y	Y	Y	Y	Y	lung	mesothelioma
H2804	1240136	Y	Y	Y	Y	Y	lung	mesothelioma
H2810	1240137	Y	Y	Y	Y	Y	lung	mesothelioma
H2818	1290814	Y	Y	Y	Y	Y	lung	mesothelioma
H2869	1240138	Y	Y	Y	Y	Y	lung	mesothelioma
H290	1240139	Y	Y	Y	Y	Y	lung	mesothelioma
H513	1240141	Y	Y	Y	Y	Y	lung	mesothelioma
IST-MES1	907173	Y	Y	Y	Y	Y	lung	mesothelioma
MPP-89	908150	Y	Y	Y	Y	Y	lung	mesothelioma
MSTO-211H	908152	Y	Y	Y	Y	Y	lung	mesothelioma
NCI-H2052	688058	Y	Y	Y	Y	Y	lung	mesothelioma
NCI-H2452	908462	Y	Y	Y	Y	Y	lung	mesothelioma
NCI-H28	908470	Y	Y	Y	Y	Y	lung	mesothelioma
42-MG-BA	687561	Y	Y	Y	Y	Y	nervous_system	glioma
8-MG-BA	687562	Y	Y	Y	Y	Y	nervous_system	glioma
A172	687563	Y	Y	Y	Y	Y	nervous_system	glioma
AM-38	910933	Y	Y	Y	Y	Y	nervous_system	glioma
Becker	906746	Y	Y	Y	Y	Y	nervous_system	glioma
CAS-1	910943	Y	Y	Y	Y	Y	nervous_system	glioma
CCF-STTG1	906823	Y	Y	Y	Y	Y	nervous_system	glioma
D-247MG	946367	Y	Y	Y	Y	Y	nervous_system	glioma
D-263MG	946368	Y	Y	Y	Y	Y	nervous_system	glioma
D-336MG	946369	Y	Y	Y	Y	Y	nervous_system	glioma
D-392MG	946370	Y	Y	Y	Y	Y	nervous_system	glioma
D-502MG	946373	Y	Y	Y	Y	Y	nervous_system	glioma
D-542MG	753549	Y	Y	Y	Y	Y	nervous_system	glioma
D-566MG	946377	Y	Y	Y	Y	Y	nervous_system	glioma
DBTRG-05MG	906835	Y	Y	Y	Y	Y	nervous_system	glioma
DK-MG	906839	Y	Y	Y	Y	Y	nervous_system	glioma
GAMG	906868	Y	Y	Y	Y	Y	nervous_system	glioma
GB-1	687568	Y	Y	Y	Y	Y	nervous_system	glioma
GI-1	906871	Y	Y	Y	Y	Y	nervous_system	glioma
GMS-10	906873	Y	Y	Y	Y	Y	nervous_system	glioma
H4	907042	Y	Y	Y	Y	Y	nervous_system	glioma
Hs683	1240150	Y	Y	Y	Y	Y	nervous_system	glioma
KALS-1	907271	Y	Y	Y	Y	Y	nervous_system	glioma
KINGS-1	907279	Y	Y	Y	Y	Y	nervous_system	glioma
KNS-42	907282	Y	Y	Y	Y	Y	nervous_system	glioma
KNS-81-FD	924188	Y	Y	Y	Y	Y	nervous_system	glioma
KS-1	907313	Y	Y	Y	Y	Y	nervous_system	glioma
LN-18	1240168	Y	Y	Y	Y	Y	nervous_system	glioma
LN-229	1240169	Y	Y	Y	Y	Y	nervous_system	glioma
LN-405	910694	Y	Y	Y	Y	Y	nervous_system	glioma
LNZTA3WT4	1240170	Y	Y	Y	Y	Y	nervous_system	glioma
M059J	949094	Y	Y	Y	Y	Y	nervous_system	glioma
MOG-G-CCM	908144	Y	Y	Y	Y	Y	nervous_system	glioma
MOG-G-UVW	908145	Y	Y	Y	Y	Y	nervous_system	glioma
NMC-G1	908449	Y	Y	Y	Y	Y	nervous_system	glioma
no-10	908452	Y	Y	Y	Y	Y	nervous_system	glioma
no-11	908450	Y	Y	Y	Y	Y	nervous_system	glioma
SF126	909712	Y	Y	Y	Y	Y	nervous_system	glioma
SF268	905986	Y	Y	Y	Y	Y	nervous_system	glioma
SF295	905985	Y	Y	Y	Y	Y	nervous_system	glioma
SF539	905984	Y	Y	Y	Y	Y	nervous_system	glioma
SK-MG-1	909729	Y	Y	Y	Y	Y	nervous_system	glioma
SNB75	905982	Y	Y	Y	Y	Y	nervous_system	glioma
SW1088	909745	Y	Y	Y	Y	Y	nervous_system	glioma
SW1783	909750	Y	Y	Y	Y	Y	nervous_system	glioma
T98G	687586	Y	Y	Y	Y	Y	nervous_system	glioma
U-118-MG	687588	Y	Y	Y	Y	Y	nervous_system	glioma
U251	905983	Y	Y	Y	Y	Y	nervous_system	glioma
U-87-MG	687590	Y	Y	Y	Y	Y	nervous_system	glioma
YH-13	909905	Y	Y	Y	Y	Y	nervous_system	glioma
YKG-1	687592	Y	Y	Y	Y	Y	nervous_system	glioma
D-283MED	906834	Y	Y	Y	Y	Y	nervous_system	medulloblastoma
Daoy	906833	Y	Y	Y	Y	Y	nervous_system	medulloblastoma
ONS-76	909248	Y	Y	Y	Y	Y	nervous_system	medulloblastoma
PFSK-1	683667	Y	Y	Y	Y	Y	nervous_system	medulloblastoma
BE2-M17	753616	Y	Y	Y	Y	Y	neuroblastoma	neuroblastoma
CHP-126	910567	Y	Y	Y	Y	Y	neuroblastoma	neuroblastoma
CHP-134	910941	Y	Y	Y	Y	Y	neuroblastoma	neuroblastoma
CHP-212	906820	Y	Y	Y	Y	Y	neuroblastoma	neuroblastoma
GI-ME-N	906872	Y	Y	Y	Y	Y	neuroblastoma	neuroblastoma
GOTO	906875	Y	Y	Y	Y	Y	neuroblastoma	neuroblastoma
IMR-5	907170	Y	Y	Y	Y	Y	neuroblastoma	neuroblastoma
KELLY	753618	Y	Y	Y	Y	Y	neuroblastoma	neuroblastoma
KP-N-YN	907314	Y	Y	Y	Y	Y	neuroblastoma	neuroblastoma
LAN-6	949170	Y	Y	Y	Y	Y	neuroblastoma	neuroblastoma
MHH-NB-11	908135	Y	Y	Y	Y	Y	neuroblastoma	neuroblastoma
NB(TU)1-10	1240181	Y	Y	Y	Y	Y	neuroblastoma	neuroblastoma
NB1	949179	Y	Y	Y	Y	Y	neuroblastoma	neuroblastoma
NB10	949171	Y	Y	Y	Y	Y	neuroblastoma	neuroblastoma
NB12	949172	Y	Y	Y	Y	Y	neuroblastoma	neuroblastoma
NB13	949177	Y	Y	Y	Y	Y	neuroblastoma	neuroblastoma
NB14	949178	Y	Y	Y	Y	Y	neuroblastoma	neuroblastoma
NB17	949175	Y	Y	Y	Y	Y	neuroblastoma	neuroblastoma
NB5	949176	Y	Y	Y	Y	Y	neuroblastoma	neuroblastoma
NB6	949173	Y	Y	Y	Y	Y	neuroblastoma	neuroblastoma
NB69	908440	Y	Y	Y	Y	Y	neuroblastoma	neuroblastoma
NB7	949174	Y	Y	Y	Y	Y	neuroblastoma	neuroblastoma
NH-12	908447	Y	Y	Y	Y	Y	neuroblastoma	neuroblastoma
SIMA	753620	Y	Y	Y	Y	Y	neuroblastoma	neuroblastoma
SK-N-AS	724828	Y	Y	Y	Y	Y	neuroblastoma	neuroblastoma
SK-N-DZ	688086	Y	Y	Y	Y	Y	neuroblastoma	neuroblastoma
SK-N-FI	688087	Y	Y	Y	Y	Y	neuroblastoma	neuroblastoma
SK-N-SH	717431	Y	Y	Y	Y	Y	neuroblastoma	neuroblastoma
TGW	910780	Y	Y	Y	Y	Y	neuroblastoma	neuroblastoma
AsPC-1	910702	Y	Y	Y	Y	Y	pancreas	pancreas
BxPC-3	906693	Y	Y	Y	Y	Y	pancreas	pancreas
CAPAN-1	753624	Y	Y	Y	Y	Y	pancreas	pancreas
Capan-2	910915	Y	Y	Y	Y	Y	pancreas	pancreas
CFPAC-1	906821	Y	Y	Y	Y	Y	pancreas	pancreas
DAN-G	1290797	Y	Y	Y	Y	Y	pancreas	pancreas
HPAC	1298136	Y	Y	Y	Y	Y	pancreas	pancreas
HPAF-II	724869	Y	Y	Y	Y	Y	pancreas	pancreas
Hs766T	1298141	Y	Y	Y	Y	Y	pancreas	pancreas
HuP-T3	907285	Y	Y	Y	Y	Y	pancreas	pancreas
HuP-T4	907286	Y	Y	Y	Y	Y	pancreas	pancreas
KP-1N	1298216	Y	Y	Y	Y	Y	pancreas	pancreas
KP-3	1298219	Y	Y	Y	Y	Y	pancreas	pancreas
KP-4	753572	Y	Y	Y	Y	Y	pancreas	pancreas
MIA-PaCa-2	724870	Y	Y	Y	Y	Y	pancreas	pancreas
MZ1-PC	753595	Y	Y	Y	Y	Y	pancreas	pancreas
PANC-02-03	1298475	Y	Y	Y	Y	Y	pancreas	pancreas
PANC-03-27	925346	Y	Y	Y	Y	Y	pancreas	pancreas
PANC-04-03	1298476	Y	Y	Y	Y	Y	pancreas	pancreas
PANC-08-13	925347	Y	Y	Y	Y	Y	pancreas	pancreas
PANC-10-05	925348	Y	Y	Y	Y	Y	pancreas	pancreas
PA-TU-8902	1298526	Y	Y	Y	Y	Y	pancreas	pancreas
PA-TU-8988T	1240201	Y	Y	Y	Y	Y	pancreas	pancreas
PL18	1240208	Y	Y	Y	Y	Y	pancreas	pancreas
PL4	1298533	Y	Y	Y	Y	Y	pancreas	pancreas
PSN1	910546	Y	Y	Y	Y	Y	pancreas	pancreas
QGP-1	1298534	Y	Y	Y	Y	Y	pancreas	pancreas
SU8686	1240218	Y	Y	Y	Y	Y	pancreas	pancreas
SUIT-2	1240219	Y	Y	Y	Y	Y	pancreas	pancreas
SW1990	910907	Y	Y	Y	Y	Y	pancreas	pancreas
YAPC	909904	Y	Y	Y	Y	Y	pancreas	pancreas
451Lu	1287706	Y	Y	Y	Y	Y	skin	melanoma
A101D	910921	Y	Y	Y	Y	Y	skin	melanoma
A2058	906792	Y	Y	Y	Y	Y	skin	melanoma
A375	906793	Y	Y	Y	Y	Y	skin	melanoma
C32	906830	Y	Y	Y	Y	Y	skin	melanoma
CHL-1	910853	Y	Y	Y	Y	Y	skin	melanoma
COLO-679	906818	Y	Y	Y	Y	Y	skin	melanoma
COLO-792	906814	Y	Y	Y	Y	Y	skin	melanoma
COLO-800	906813	Y	Y	Y	Y	Y	skin	melanoma
COLO-829	687448	Y	Y	Y	Y	Y	skin	melanoma
CP50-MEL-B	753545	Y	Y	Y	Y	Y	skin	melanoma
CP66-MEL	753546	Y	Y	Y	Y	Y	skin	melanoma
G-361	906865	Y	Y	Y	Y	Y	skin	melanoma
GAK	910932	Y	Y	Y	Y	Y	skin	melanoma
G-MEL	1240130	Y	Y	Y	Y	Y	skin	melanoma
HMV-II	907058	Y	Y	Y	Y	Y	skin	melanoma
Hs940-T	1298145	Y	Y	Y	Y	Y	skin	melanoma
HT-144	907067	Y	Y	Y	Y	Y	skin	melanoma
IGR-1	907169	Y	Y	Y	Y	Y	skin	melanoma
IGR-37	1240153	Y	Y	Y	Y	Y	skin	melanoma
IPC-298	907171	Y	Y	Y	Y	Y	skin	melanoma
IST-MEL1	907172	Y	Y	Y	Y	Y	skin	melanoma
LB2518-MEL	753579	Y	Y	Y	Y	Y	skin	melanoma
LB373-MEL-D	753581	Y	Y	Y	Y	Y	skin	melanoma
LOXIMVI	905974	Y	Y	Y	Y	Y	skin	melanoma
M14	905975	Y	Y	Y	Y	Y	skin	melanoma
MEL-HO	908124	Y	Y	Y	Y	Y	skin	melanoma
MEL-JUSO	908125	Y	Y	Y	Y	Y	skin	melanoma
Mewo	908128	Y	Y	Y	Y	Y	skin	melanoma
MMAC-SF	925339	Y	Y	Y	Y	Y	skin	melanoma
MZ2-MEL	971777	Y	Y	Y	Y	Y	skin	melanoma
MZ7-mel	753596	Y	Y	Y	Y	Y	skin	melanoma
RPMI-7951	910903	Y	Y	Y	Y	Y	skin	melanoma
RVH-421	909706	Y	Y	Y	Y	Y	skin	melanoma
SH-4	909713	Y	Y	Y	Y	Y	skin	melanoma
SK-MEL-1	909723	Y	Y	Y	Y	Y	skin	melanoma
SK-MEL-2	905955	Y	Y	Y	Y	Y	skin	melanoma
SK-MEL-24	909725	Y	Y	Y	Y	Y	skin	melanoma
SK-MEL-28	905954	Y	Y	Y	Y	Y	skin	melanoma
SK-MEL-3	909724	Y	Y	Y	Y	Y	skin	melanoma
SK-MEL-30	909726	Y	Y	Y	Y	Y	skin	melanoma
SK-MEL-31	909727	Y	Y	Y	Y	Y	skin	melanoma
SK-MEL-5	905956	Y	Y	Y	Y	Y	skin	melanoma
UACC-257	905977	Y	Y	Y	Y	Y	skin	melanoma
UACC-62	905976	Y	Y	Y	Y	Y	skin	melanoma
WM-115	909784	Y	Y	Y	Y	Y	skin	melanoma
WM1552C	1299078	Y	Y	Y	Y	Y	skin	melanoma
WM278	1240226	Y	Y	Y	Y	Y	skin	melanoma
WM35	1299080	Y	Y	Y	Y	Y	skin	melanoma
WM793B	1299081	Y	Y	Y	Y	Y	skin	melanoma
A388	910697	Y	Y	Y	Y	Y	skin	skin_other
A431	910925	Y	Y	Y	Y	Y	skin	skin_other
DJM-1	906841	Y	Y	Y	Y	Y	skin	skin_other
HT-1080	907064	Y	Y	Y	Y	Y	soft_tissue	fibrosarcoma
SW684	909754	Y	Y	Y	Y	Y	soft_tissue	fibrosarcoma
A204	910784	Y	Y	Y	Y	Y	soft_tissue	rhabdomyosarcoma
A673	684052	Y	Y	Y	Y	Y	soft_tissue	rhabdomyosarcoma
KYM-1	1240166	Y	Y	Y	Y	Y	soft_tissue	rhabdomyosarcoma
RD	909264	Y	Y	Y	Y	Y	soft_tissue	rhabdomyosarcoma
RH-1	971773	Y	Y	Y	Y	Y	soft_tissue	rhabdomyosarcoma
RH-18	971774	Y	Y	Y	Y	Y	soft_tissue	rhabdomyosarcoma
RH-41	1240210	Y	Y	Y	Y	Y	soft_tissue	rhabdomyosarcoma
SJRH30	909716	Y	Y	Y	Y	Y	soft_tissue	rhabdomyosarcoma
TE-441-T	924248	Y	Y	Y	Y	Y	soft_tissue	rhabdomyosarcoma
G-402	907298	Y	Y	Y	Y	Y	soft_tissue	soft_tissue_other
GCT	906999	Y	Y	Y	Y	Y	soft_tissue	soft_tissue_other
MFH-ino	925343	Y	Y	Y	Y	Y	soft_tissue	soft_tissue_other
SK-LMS-1	909720	Y	Y	Y	Y	Y	soft_tissue	soft_tissue_other
SK-UT-1	909732	Y	Y	Y	Y	Y	soft_tissue	soft_tissue_other
SW872	909756	Y	Y	Y	Y	Y	soft_tissue	soft_tissue_other
SW982	909759	Y	Y	Y	Y	Y	soft_tissue	soft_tissue_other
VA-ES-BJ	688121	Y	Y	Y	Y	Y	soft_tissue	soft_tissue_other
8305C	906795	Y	Y	Y	Y	Y	thyroid	thyroid
8505C	924102	Y	Y	Y	Y	Y	thyroid	thyroid
ASH-3	1290722	Y	Y	Y	Y	Y	thyroid	thyroid
BCPAP	924104	Y	Y	Y	Y	Y	thyroid	thyroid
BHT-101	906696	Y	Y	Y	Y	Y	thyroid	thyroid
CAL-62	906828	Y	Y	Y	Y	Y	thyroid	thyroid
CGTH-W-1	910568	Y	Y	Y	Y	Y	thyroid	thyroid
FTC-133	906864	Y	Y	Y	Y	Y	thyroid	thyroid
HTC-C3	924151	Y	Y	Y	Y	Y	thyroid	thyroid
IHH-4	1240154	Y	Y	Y	Y	Y	thyroid	thyroid
K5	924238	Y	Y	Y	Y	Y	thyroid	thyroid
ML-1	1240178	Y	Y	Y	Y	Y	thyroid	thyroid
RO82-W-1	930083	Y	Y	Y	Y	Y	thyroid	thyroid
TT	930299	Y	Y	Y	Y	Y	thyroid	thyroid
TT2609-C02	1240223	Y	Y	Y	Y	Y	thyroid	thyroid
5637	687452	Y	Y	Y	Y	Y	urogenital_system	Bladder
639-V	906798	Y	Y	Y	Y	Y	urogenital_system	Bladder
647-V	906797	Y	Y	Y	Y	Y	urogenital_system	Bladder
BFTC-905	910926	Y	Y	Y	Y	Y	urogenital_system	Bladder
CAL-29	1290730	Y	Y	Y	Y	Y	urogenital_system	Bladder
DSH1	753552	Y	Y	Y	Y	Y	urogenital_system	Bladder
HT-1197	907065	Y	Y	Y	Y	Y	urogenital_system	Bladder
HT-1376	907066	Y	Y	Y	Y	Y	urogenital_system	Bladder
J82	753566	Y	Y	Y	Y	Y	urogenital_system	Bladder
KU-19-19	907312	Y	Y	Y	Y	Y	urogenital_system	Bladder
LB831-BLC	753584	Y	Y	Y	Y	Y	urogenital_system	Bladder
RT-112	909704	Y	Y	Y	Y	Y	urogenital_system	Bladder
RT4	687455	Y	Y	Y	Y	Y	urogenital_system	Bladder
SW1710	909749	Y	Y	Y	Y	Y	urogenital_system	Bladder
SW780	687457	Y	Y	Y	Y	Y	urogenital_system	Bladder
T-24	724812	Y	Y	Y	Y	Y	urogenital_system	Bladder
TCCSUP	687459	Y	Y	Y	Y	Y	urogenital_system	Bladder
UM-UC-3	724838	Y	Y	Y	Y	Y	urogenital_system	Bladder
VM-CUB-1	909780	Y	Y	Y	Y	Y	urogenital_system	Bladder
C-33-A	687505	Y	Y	Y	Y	Y	urogenital_system	cervix
C-4-I	687506	Y	Y	Y	Y	Y	urogenital_system	cervix
CAL-39	924107	Y	Y	Y	Y	Y	urogenital_system	cervix
Ca-Ski	906824	Y	Y	Y	Y	Y	urogenital_system	cervix
DoTc2-4510	906843	Y	Y	Y	Y	Y	urogenital_system	cervix
HeLa	1298134	Y	Y	Y	Y	Y	urogenital_system	cervix
HT-3	907068	Y	Y	Y	Y	Y	urogenital_system	cervix
ME-180	687514	Y	Y	Y	Y	Y	urogenital_system	cervix
MS751	1240179	Y	Y	Y	Y	Y	urogenital_system	cervix
SiHa	930297	Y	Y	Y	Y	Y	urogenital_system	cervix
SISO	1240212	Y	Y	Y	Y	Y	urogenital_system	cervix
SKG-IIIa	930298	Y	Y	Y	Y	Y	urogenital_system	cervix
SW756	724839	Y	Y	Y	Y	Y	urogenital_system	cervix
TC-YIK	946357	Y	Y	Y	Y	Y	urogenital_system	cervix
AN3-CA	910781	Y	Y	Y	Y	Y	urogenital_system	endometrium
COLO-684	910691	Y	Y	Y	Y	Y	urogenital_system	endometrium
EN	1240127	Y	Y	Y	Y	Y	urogenital_system	endometrium
ESS-1	907000	Y	Y	Y	Y	Y	urogenital_system	endometrium
HEC-1	907051	Y	Y	Y	Y	Y	urogenital_system	endometrium
KLE	924187	Y	Y	Y	Y	Y	urogenital_system	endometrium
MFE-280	908129	Y	Y	Y	Y	Y	urogenital_system	endometrium
MFE-296	908130	Y	Y	Y	Y	Y	urogenital_system	endometrium
MFE-319	1240174	Y	Y	Y	Y	Y	urogenital_system	endometrium
SNG-M	909735	Y	Y	Y	Y	Y	urogenital_system	endometrium
A2780	906804	Y	Y	Y	Y	Y	urogenital_system	ovary
Caov-4	949090	Y	Y	Y	Y	Y	urogenital_system	ovary
EFO-21	911905	Y	Y	Y	Y	Y	urogenital_system	ovary
EFO-27	906852	Y	Y	Y	Y	Y	urogenital_system	ovary
ES-2	1240128	Y	Y	Y	Y	Y	urogenital_system	ovary
FU-OV-1	1240129	Y	Y	Y	Y	Y	urogenital_system	ovary
IGROV-1	905968	Y	Y	Y	Y	Y	urogenital_system	ovary
JHOS-2	1479995	Y	Y	Y	Y	Y	urogenital_system	ovary
JHOS-3	1480358	Y	Y	Y	Y	Y	urogenital_system	ovary
JHOS-4	1480359	Y	Y	Y	Y	Y	urogenital_system	ovary
KGN	924186	Y	Y	Y	Y	Y	urogenital_system	ovary
KURAMOCHI	909975	Y	Y	Y	Y	Y	urogenital_system	ovary
OAW-28	946360	Y	Y	Y	Y	Y	urogenital_system	ovary
OAW-42	910548	Y	Y	Y	Y	Y	urogenital_system	ovary
OC-314	909257	Y	Y	Y	Y	Y	urogenital_system	ovary
OV-17R	1480361	Y	Y	Y	Y	Y	urogenital_system	ovary
OV-56	1480362	Y	Y	Y	Y	Y	urogenital_system	ovary
OV-7	1480360	Y	Y	Y	Y	Y	urogenital_system	ovary
OV-90	1240197	Y	Y	Y	Y	Y	urogenital_system	ovary
OVCA420	1480364	Y	Y	Y	Y	Y	urogenital_system	ovary
OVCAR-3	905933	Y	Y	Y	Y	Y	urogenital_system	ovary
OVCAR-4	905990	Y	Y	Y	Y	Y	urogenital_system	ovary
OVCAR-5	905969	Y	Y	Y	Y	Y	urogenital_system	ovary
OVCAR-8	905991	Y	Y	Y	Y	Y	urogenital_system	ovary
OVISE	1240198	Y	Y	Y	Y	Y	urogenital_system	ovary
OVK-18	1480371	Y	Y	Y	Y	Y	urogenital_system	ovary
OVKATE	1240199	Y	Y	Y	Y	Y	urogenital_system	ovary
OVMIU	1240200	Y	Y	Y	Y	Y	urogenital_system	ovary
OVTOKO	1298365	Y	Y	Y	Y	Y	urogenital_system	ovary
PA-1	909255	Y	Y	Y	Y	Y	urogenital_system	ovary
PEO1	1480372	Y	Y	Y	Y	Y	urogenital_system	ovary
RKN	1298539	Y	Y	Y	Y	Y	urogenital_system	ovary
RMG-I	909699	Y	Y	Y	Y	Y	urogenital_system	ovary
SK-OV-3	905959	Y	Y	Y	Y	Y	urogenital_system	ovary
SW626	909753	Y	Y	Y	Y	Y	urogenital_system	ovary
TOV-112D	1299070	Y	Y	Y	Y	Y	urogenital_system	ovary
TOV-21G	1240222	Y	Y	Y	Y	Y	urogenital_system	ovary
TYK-nu	909774	Y	Y	Y	Y	Y	urogenital_system	ovary
UWB1.289	1480374	Y	Y	Y	Y	Y	urogenital_system	ovary
22RV1	924100	Y	Y	Y	Y	Y	urogenital_system	prostate
BPH-1	924105	Y	Y	Y	Y	Y	urogenital_system	prostate
DU-145	905935	Y	Y	Y	Y	Y	urogenital_system	prostate
LNCaP-Clone-FGC	907788	Y	Y	Y	Y	Y	urogenital_system	prostate
PC-3	905934	Y	Y	Y	Y	Y	urogenital_system	prostate
PWR-1E	1330993	Y	Y	Y	Y	Y	urogenital_system	prostate
VCaP	1299075	Y	Y	Y	Y	Y	urogenital_system	prostate
NCCIT	908441	Y	Y	Y	Y	N	urogenital_system	testis
NEC8	910942	Y	Y	Y	Y	Y	urogenital_system	testis
NTERA-2 cl.D1	908454	Y	Y	Y	Y	Y	urogenital_system	testis
JAR	907175	Y	Y	Y	Y	Y	urogenital_system	urogenital_system_other
JEG-3	907176	Y	Y	Y	Y	Y	urogenital_system	urogenital_system_other
SW954	924247	Y	Y	Y	Y	Y	urogenital_system	urogenital_system_other
SW962	909758	Y	Y	Y	Y	Y	urogenital_system	urogenital_system_other
MES-SA	908127	Y	Y	Y	Y	Y	urogenital_system	uterus
SKN	1240215	Y	Y	Y	Y	Y	urogenital_system	uterus
DMS-79	753551	Y	Y	Y	Y	Y	lung_SCLC	lung_small_cell_carcinoma
CMK	910566	Y	Y	Y	N	Y	leukemia	acute_myeloid_leukaemia
NB-4	1323913	Y	Y	Y	N	Y	leukemia	acute_myeloid_leukaemia
MHH-CALL-4	908133	Y	Y	Y	Y	N	leukemia	B_cell_leukemia
BC-3	910918	Y	Y	N	Y	Y	lymphoma	B_cell_lymphoma
HT	907063	Y	Y	N	Y	Y	lymphoma	B_cell_lymphoma
JM1	1327768	Y	Y	Y	N	Y	lymphoma	B_cell_lymphoma
BONNA-12	906695	Y	Y	Y	Y	N	leukemia	hairy_cell_leukaemia
ES6	949157	Y	Y	Y	N	Y	bone	ewings_sarcoma
MHH-ES-1	908134	Y	Y	N	Y	Y	bone	ewings_sarcoma
DIFI	1789883	Y	Y	N	Y	Y	large_intestine	large_intestine
NCI-H508	908442	Y	Y	N	Y	Y	large_intestine	large_intestine
SNU-283	1659929	Y	Y	Y	Y	N	large_intestine	large_intestine
SW620	905962	Y	Y	Y	N	Y	large_intestine	large_intestine
JHH-2	1240157	Y	N	Y	Y	Y	digestive_system	liver
JHH-4	1240158	Y	N	Y	Y	Y	digestive_system	liver
RCC-JF	1524415	Y	Y	Y	N	Y	kidney	kidney
SW156	1240220	Y	N	Y	Y	Y	kidney	kidney
HOP-62	905972	Y	Y	Y	N	Y	lung_NSCLC	lung_NSCLC_adenocarcinoma
NCI-H1437	687794	Y	Y	N	Y	Y	lung_NSCLC	lung_NSCLC_adenocarcinoma
PC-3 [JPC-3]	1240202	Y	Y	Y	N	Y	lung_NSCLC	lung_NSCLC_adenocarcinoma
NCI-H740	1331055	Y	Y	Y	Y	N	lung_SCLC	lung_small_cell_carcinoma
COR-L95	1297439	Y	Y	Y	N	Y	lung_SCLC	lung_small_cell_carcinoma
HCC-33	1303901	Y	Y	N	Y	Y	lung_SCLC	lung_small_cell_carcinoma
NCI-H128	753597	Y	Y	N	Y	Y	lung_SCLC	lung_small_cell_carcinoma
NCI-H1304	753599	Y	Y	Y	N	Y	lung_SCLC	lung_small_cell_carcinoma
NCI-H2081	908480	Y	Y	N	Y	Y	lung_SCLC	lung_small_cell_carcinoma
NCI-H2171	688015	Y	Y	N	Y	Y	lung_SCLC	lung_small_cell_carcinoma
SHP-77	724872	Y	Y	Y	N	Y	lung_SCLC	lung_small_cell_carcinoma
SW1271	1299062	Y	Y	Y	N	Y	lung_SCLC	lung_small_cell_carcinoma
D-423MG	946372	Y	Y	Y	N	Y	nervous_system	glioma
KP-N-RT-BM-1	924189	Y	Y	N	Y	Y	neuroblastoma	neuroblastoma
KP-N-YS	946363	Y	Y	N	Y	Y	neuroblastoma	neuroblastoma
MC-IXC	908118	Y	Y	N	Y	Y	neuroblastoma	neuroblastoma
COLO-783	1240125	Y	Y	Y	N	Y	skin	melanoma
CP67-MEL	949092	Y	Y	N	Y	Y	skin	melanoma
Hs633T	1240149	Y	N	Y	Y	Y	soft_tissue	fibrosarcoma
KMH-2	1298167	Y	Y	N	Y	Y	thyroid	thyroid
OMC-1	949154	Y	Y	N	Y	Y	urogenital_system	cervix
RL95-2	930082	Y	Y	Y	N	Y	urogenital_system	endometrium
Caov-3	906825	Y	Y	N	Y	Y	urogenital_system	ovary
DOV13	1479987	Y	Y	Y	N	Y	urogenital_system	ovary
Hey	1479988	Y	Y	Y	N	Y	urogenital_system	ovary
NCI-H660	1330975	Y	Y	Y	Y	N	urogenital_system	prostate
JHU-029	1298156	Y	Y	Y	N	Y	aero_dig_tract	head and neck
SCC90	1299052	Y	Y	Y	N	Y	aero_dig_tract	head and neck
MOLM-16	1330948	Y	Y	Y	N	Y	leukemia	acute_myeloid_leukaemia
OCI-LY7	1659819	Y	Y	Y	N	Y	lymphoma	B_cell_lymphoma
KMS-11	1659817	Y	Y	Y	N	Y	myeloma	myeloma
CHSA0011	1290767	Y	Y	Y	N	Y	bone	chondrosarcoma
CHSA0108	1290768	Y	Y	Y	N	Y	bone	chondrosarcoma
JIMT-1	1298157	Y	Y	Y	N	Y	breast	breast
CL-34	1290771	Y	Y	Y	N	Y	large_intestine	large_intestine
VMRC-LCD	713869	Y	Y	Y	N	Y	lung_NSCLC	lung_NSCLC_adenocarcinoma
K2	1298160	Y	Y	Y	N	Y	skin	melanoma
STS-0421	1299061	Y	Y	Y	N	Y	soft_tissue	soft_tissue_other
MY-M12	1330960	Y	Y	N	N	Y	leukemia	leukemia
TALL-1	909762	Y	Y	N	N	Y	leukemia	lymphoblastic_T_cell_leukaemia
NK-92MI	1330981	Y	Y	N	N	Y	lymphoma	lymphoid_neoplasm other
MDA-MB-175-VII	908120	Y	Y	N	N	Y	breast	breast
YMB-1-E	1303911	Y	Y	N	N	Y	breast	breast
VMRC-RCW	1240224	Y	Y	N	N	Y	kidney	kidney
NCI-H460	905943	Y	Y	N	N	Y	lung_NSCLC	lung_NSCLC_large cell
RERF-LC-FM	930081	Y	Y	N	Y	N	lung_SCLC	lung_small_cell_carcinoma
D-245MG	946366	Y	Y	N	Y	N	nervous_system	glioma
Hs939-T	1298144	Y	Y	N	N	Y	skin	melanoma
VMRC-MELG	930301	Y	Y	N	N	Y	skin	melanoma
OVCA433	1480367	Y	Y	N	N	Y	urogenital_system	ovary
TMK-1	1299069	Y	Y	N	N	Y	digestive_system	stomach
KP-2	1298218	Y	N	Y	N	Y	pancreas	pancreas
KO52	1330932	Y	Y	N	N	N	leukemia	acute_myeloid_leukaemia
SC-1	1331030	Y	Y	N	N	N	lymphoma	B_cell_lymphoma
U-CH2	1503373	Y	Y	N	N	N	bone	bone_other
TOTAL:		1001	996	968	957	990
